# Comparative (Meta)genomic Analysis and Ecological Profiling of Human Gut-Specific Bacteriophage $\phi$ B124-14

Lesley A. Ogilvie<sup>1</sup>, Jonathan Caplin<sup>2</sup>, Cinzia Dedi<sup>1</sup>, David Diston<sup>2\*</sup>, Elizabeth Cheek<sup>3</sup>, Lucas Bowler<sup>4</sup>, Huw Taylor<sup>2</sup>, James Ebdon<sup>2</sup>, Brian V. Jones<sup>1\*</sup>

**1** Centre for Biomedical and Health Science Research, School of Pharmacy and Biomolecular Sciences, University of Brighton, Brighton, United Kingdom, **2** School of Environment and Technology, University of Brighton, Brighton, United Kingdom, **3** School of Computing, Engineering and Mathematics, University of Brighton, Brighton, United Kingdom, **4** Sussex Proteomics Centre, University of Sussex, Brighton, United Kingdom

## Abstract

Bacteriophage associated with the human gut microbiome are likely to have an important impact on community structure and function, and provide a wealth of biotechnological opportunities. Despite this, knowledge of the ecology and composition of bacteriophage in the gut bacterial community remains poor, with few well characterized gut-associated phage genomes currently available. Here we describe the identification and in-depth (meta)genomic, proteomic, and ecological analysis of a human gut-specific bacteriophage (designated  $\phi$ B124-14). In doing so we illuminate a fraction of the biological dark matter extant in this ecosystem and its surrounding eco-genomic landscape, identifying a novel and uncharted bacteriophage gene-space in this community.  $\phi$ B124-14 infects only a subset of closely related gut-associated *Bacteroides fragilis* strains, and the circular genome encodes functions previously found to be rare in viral genomes and human gut viral metagenome sequences, including those which potentially confer advantages upon phage and/or host bacteria. Comparative genomic analyses revealed  $\phi$ B124-14 is most closely related to  $\phi$ B40-8, the only other publically available *Bacteroides sp.* phage genome, whilst comparative metagenomic analysis of both phage failed to identify any homologous sequences in 136 non-human gut metagenomic datasets searched, supporting the human gut-specific nature of this phage. Moreover, a potential geographic variation in the carriage of these and related phage was revealed by analysis of their distribution and prevalence within 151 human gut microbiomes and viromes from Europe, America and Japan. Finally, ecological profiling of  $\phi$ B124-14 and  $\phi$ B40-8, using both gene-centric alignment-driven phylogenetic analyses, as well as alignment-free gene-independent approaches was undertaken. This not only verified the human gut-specific nature of both phage, but also indicated that these phage populate a distinct and unexplored ecological landscape within the human gut microbiome.

**Citation:** Ogilvie LA, Caplin J, Dedi C, Diston D, Cheek E, et al. (2012) Comparative (Meta)genomic Analysis and Ecological Profiling of Human Gut-Specific Bacteriophage  $\phi$ B124-14. PLoS ONE 7(4): e35053. doi:10.1371/journal.pone.0035053

**Editor:** Jonathan H. Badger, J. Craig Venter Institute, United States of America

**Received:** November 23, 2011; **Accepted:** March 8, 2012; **Published:** April 25, 2012

**Copyright:** © 2012 Ogilvie et al. This is an open-access article distributed under the terms of the Creative Commons Attribution License, which permits unrestricted use, distribution, and reproduction in any medium, provided the original author and source are credited.

**Funding:** Dr. Lesley Ogilvie is supported by funding from the Medical Research Council (Grant ID number 93344/G0901553 awarded to Dr. B. V. Jones). Research in the laboratory of Dr. B. V. Jones is also supported by funding from the Hospital Infection Society, The Royal Society, The Society for Applied Microbiology, The University of Brighton, and the European Union (FP7 Marie Curie IAPP scheme). The funders had no role in study design, data collection and analysis, decision to publish, or preparation of the manuscript.

**Competing Interests:** The authors have declared that no competing interests exist.

\* E-mail: B.V.Jones@Brighton.ac.uk

† Current address: Bundesamt für Gesundheit, Köniz, Bern, Switzerland

## Introduction

The human gut harbours a diverse microbial community which in turn plays host to a variety of mobile genetic elements (MGE) and bacteriophages, forming the gut mobile metagenome [1–4]. The role of this flexible gene pool in the development and functioning of the gut microbial community remains largely unexplored, yet there is emerging evidence that this mobile metagenome reflects the co-evolution of host and microbe in this community, and that some MGE may be unique to or enriched within this ecosystem [1,4–8].

Identification and characterization of such elements will provide much insight into fundamental aspects of development and functioning of the gut microbiota, and provide the raw material for the development of novel molecular tools. Furthermore, MGE comprising the human gut mobile metagenome are also likely to encode a range of functions of biotechnological or pharmaceutical

interest [9]. Bacteriophages in particular have the potential to influence community structure and function [10–15], and are regarded to be of considerable biotechnological value, exemplified by the growing interest in their use as novel and highly selective therapeutic agents (for review see [16]). Initial studies of the gut virome have already provided evidence of distinct viral population dynamics and gene content in this ecosystem, with a dominance of apparently temperate phage and a relative lack of the predator-prey phage-host relationship commonly observed in other microbial communities [6].

Through selective elimination of species within the gut microbiota, phage may alter community function, metabolic output and subsequently impact on host health [17–19]. Furthermore, there is also scope for the direct interaction of bacteriophage with the host immune system, which may be important in the pathogenesis of some gut related disorders [17]. The observation that dense bacteriophage populations are

associated with the gut mucosa, and numbers are elevated in patients with Crohn's disease, emphasizes the possible role of these bacterial viruses in community function, interaction with the host, and disease pathogenesis [19].

The characterisation of bacteriophage specific to the human gut is also of considerable interest for the development of microbial source tracking tools (MST), which permit determination of faecal source in surface and ground waters [20–24]. Faecal contamination of surface waters poses a major risk to public health, and bacteriophages specific to human faecal indicator bacteria (and the human gut microbiome) have already been successfully employed as water quality indicators that can specifically identify pollution originating from human sources [20–22,25,26]. Bacteriophage offer numerous advantages in these applications and are not only thought to persist longer in the environment than host bacteria but can often be found in higher numbers making them a more sensitive source tracking tool [22]. In particular, the development of rapid and sensitive culture-independent methods for detection of human faecal indicator phage, directly in environmental samples, offers significant advantages over classic culture-based approaches, and there is presently much interest in developing and implementing such strategies [27].

However, the development of culture-independent phage-based MST tools, along with our improved understanding of bacteriophage in the gut community, is hindered by the lack of well-characterized bacteriophage with defined host-ranges and available genome sequences, which infect prominent and important species of human gut bacteria. A prime example is the availability of only one complete *Bacteroides* spp. phage genome sequence in public databases (as of Oct 2011), despite the prominence and importance of this group of bacteria in the human gut microbiome [28,29].

We have previously isolated bacteriophage infecting the human faecal indicator bacteria *Bacteroides* sp. GB-124 from municipal wastewaters, and found these to be present in human faecal samples, but absent from faecal samples derived from a wide range of domestic and wild animals, as well as from the general environment, strongly suggesting these phage are human gut-specific [20]. Because of the apparent gut-specific nature of these phage, and the growing evidence of their usefulness as MST, in-depth genomic characterization would not only begin to address the current lack of knowledge regarding gut-associated bacteriophage (and *Bacteroides* phage in particular), but would also provide the genetic information required for development of culture-independent MST.

This motivated us to undertake an in-depth characterization of one such phage designated  $\phi$ B124-14. This phage was selected as it not only appears to be representative of a morphologically and phenotypically homogenous group of human-specific phages, but also displayed greater environmental stability than other phage tested (particularly in terms of UV resistance), suggesting an excellent environmental “half-life” (D. Diston Jan 2010, pers. comm.). Here we have characterized the host range, complete genome sequence and proteome of  $\phi$ B124-14. Using comparative metagenomic analysis and genome signature-based approaches we subsequently examined its ecological profile in relation to 611 other bacteriophage genomes available on GenBank, as well as human gut-specific viral metagenomes [6].

Overall, these investigations support the human gut specific nature of  $\phi$ B124-14 and indicate that this phage occupies a distinct and largely unexplored ecological landscape within the human gut microbiome. We also increase the available number of well-characterized genomes of bacteriophage infecting prominent members of the human gut microbiota. This will not only enhance

our fundamental understanding of this important microbial ecosystem, but will facilitate the development of sensitive and rapid culture-independent MST tools.

## Results and Discussion

### $\phi$ B124-14 physical characteristics and host range

Transmission Electron Microscopy (TEM) shows  $\phi$ B124-14 has a binary morphology with an icosahedral head and a non-contractile tail (Figure 1A), placing it in the *Caudovirale* order, *Siphoviridae* family [30]. The phage produces small (0.7 mm  $\pm$  0.3), clear plaques on a lawn of the original host *Bacteroides* sp. GB-124. Structural dimensions are similar to the *B. fragilis* faecal pollution indicator phage B40-8 ( $\phi$ B40-8; also referred to as phage ATCC 51477-B1; GenBank accession no. FJ008913.1) [31], with tail length of 162 nm  $\pm$  21, tail diameter of 13.6 nm  $\pm$  1.6, and a slightly smaller head diameter measurement of 49.8 nm  $\pm$  3.9 (versus  $\phi$ B40-8 measurements of 60  $\pm$  4.0 nm). The morphology of the  $\phi$ B124-14 capsid is in keeping with metagenomic surveys of human gut bacteriophage, in which the majority of identifiable viruses were Siphophages [10].

Previous studies indicated that the host bacterium, *Bacteroides* sp. GB-124, was most closely related to *B. ovatus* based on comparison of 16S rRNA gene sequences (96% identity; [26]). However, since 97% identity between 16S genes is typically used as the cut off for species level identification [32], and in light of the recent release of many additional *Bacteroides* genome sequences from human gut isolates (as part of the human microbiome project), we investigated the identity of *Bacteroides* sp. GB-124 in more detail. This new analysis revealed GB-124 to be a strain of *B. fragilis* (designated here *B. fragilis* GB-124), with 16S rRNA gene sequences exhibiting 99% identity to a number of other *B. fragilis* strains, including those isolated from the same municipal wastewater site as well as strains HSP40, 683R, YCH46, JCM 17586 and JCM 17587 isolated from various human body sites and human faeces (Table S1, Figure 1B; accession numbers given on figure).

Investigation of the ability of  $\phi$ B124-14 to infect and lyse a range of *Bacteroides* spp. commonly associated with the human gut microbiota, demonstrated that this phage has a highly restricted host range.  $\phi$ B124-14 was capable of infecting only a subset of *B. fragilis* strains isolated from the same municipal wastewater site and *B. fragilis* strain DSM 1396 (Figure 1B; Table S1), originally isolated from human pleural fluid [33]. No activity was observed against other *Bacteroides* spp. tested, or against strains of *B. fragilis* isolated from geographically distinct municipal wastewaters, namely, Galicia, Spain [20] and Hawaii, USA [34] (Figure 1B; Table S1).

Overall, these observations indicate that *Bacteroides* spp. within the human gut microbiota play host to bacteriophage with extremely narrow host ranges, and in at least some cases these are restricted to closely related strains. Such narrow host range may be the result of the extreme niche specialization thought to occur at short phylogenetic distances in gut bacteria [7], likely resulting in strain-to-strain variation in surface proteins or other structures exploited by phage as receptors. In this regard, it is notable that horizontal gene transfer mediated by phage and other mobile elements [35], as well as the selective pressure imposed on host bacteria by phage themselves [6,36,37] can all promote modification of surface structures and contribute to strain diversification. In the case of surface structures, since these are often key to host-microbe interactions, and may include those that are important to nutrient acquisition and competition between strains, such diversification also has the potential to influence the interaction of bacteria with the human host [35]. Phage with such restricted

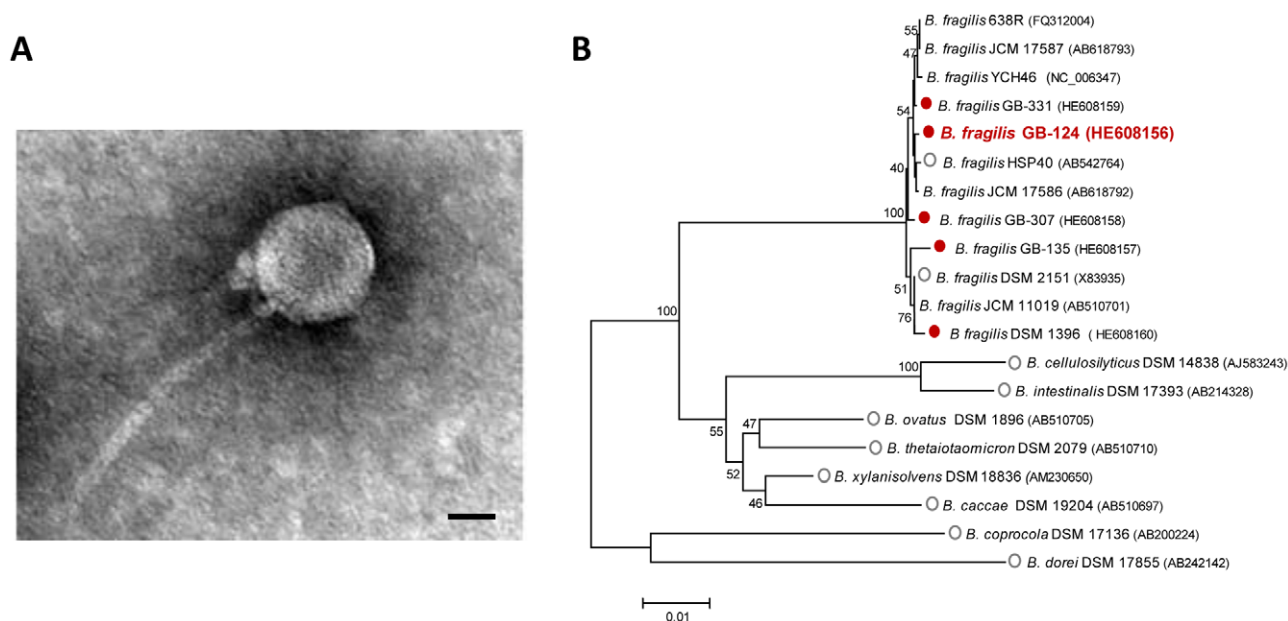

**Figure 1. Physical structure and host range of  $\phi$ B124-14.** **A.** Transmission electron micrograph of  $\phi$ B124-14 showing phage capsid composed of an icosahedral head and a non-contractile tail. Magnification 50,000 $\times$ . Scale Bar, 20 nm. **B.** Phylogenetic characterisation of *B. fragilis*  $\phi$ B124-14 host strains. Consensus maximum likelihood trees were constructed from 16S rRNA gene sequences, with 1000 bootstrap resamplings using MEGA v5. Bootstrap values of 40 or greater are shown adjacent to respective nodes. Accession numbers for bacterial 16S sequences are given in brackets following species names on the tree. The ability of  $\phi$ B124-14 to replicate in a particular host species was tested in standard agar overlay assays, in which replication of  $\phi$ B124-14 in a particular host was indicated by production of plaques in bacterial lawns. Species tested in host range assays are denoted by open or filled circles. Filled red circles indicate strains which support  $\phi$ B124-14 replication, and open grey circles indicate strains in which  $\phi$ B124 did not replicate.

doi:10.1371/journal.pone.0035053.g001

host ranges are also unlikely to produce a significant impact on overall microbial community structure and functioning due to functional redundancy among members of the gut microbiome [6,29].

**Genome structure and sequence overview.** The dsDNA genome of  $\phi$ B124-14 is 47,159 bp with an average G+C content of 38.75%, and predicted to encode 68 open reading frames (ORFs) with an average size of 212 aa. The genome exhibits the high coding density typical of bacteriophage, with non-coding sequence limited to 8.2% of the genome (Figure 2A). Restriction fragment patterns are compatible with a circular genome structure, and indicated that the  $\phi$ B124-14 is packaged as a circular molecule (Figure 3), as has been described for bacteriophages P2 and P4 [38,39].

Similar to the host bacterial species, *B. fragilis*, the majority of putative ORFs detected are predicted to be initiated by an ATG start codon, with one ORF (ORF10) presenting a CTG start codon, and two initiated by GTG codons (ORF34, ORF44). A number of ORF start and stop codons overlap (Table S2; Figure 2A); a feature common to bacteriophage genomes, which has been hypothesised to facilitate gene regulation and allow an increased repertoire of proteins without a corresponding increase in genome size [40,41]. Based on the protein BLAST algorithm (BlastP; <http://blast.ncbi.nlm.nih.gov/Blast.cgi>) and proteomic analysis, 18 of the predicted ORFs have an assignable function, and 12 ORFs contain conserved domain signatures (Table S2; Figure 2A). The majority of ORFs with an assigned function encode proteins with predicted roles in DNA replication and regulation, with the remainder predicted to encode functions related to capsid structure, packaging, and host lysis (Table S2; Figure 2A).

No function could be predicted for 50 ORFs which were all designated as proteins of unknown function (Table S2; Figure 2A,B). Of these, 29 were homologous to ORFs within the  $\phi$ B40-8 genome or the genomes of *Bacteroides* spp., and a further 21 exhibited no significant homology to any sequences within the public databases (Table S2; Figure 2A, B, C). This likely reflects the general paucity of bacteriophage genome sequences within public databases (only one other complete *Bacteroides* spp. phage genome [31] is currently available in public databases, as of October 2011), as well as the high level of uncharacterized functions typically encoded by phage genomes [6,42].

### Genome architecture and phage encoded functions

The clustering of functionally related genes and modular gene architecture is a common feature of bacteriophage genomes. Based on gene architecture, putative transcriptional coupling, and the functional assignments of ORFs, the  $\phi$ B124-14 genome also exhibits a modular organisation with functional gene clusters related to packaging, capsid structure and assembly, as well as DNA replication and regulation, and host lysis (Figure 2A,B; Table S2). A comparable gene architecture and functional clustering has also been described in  $\phi$ B40-8, which exhibits a similar array of loosely defined gene modules containing high levels of ORFs of unknown function [31]. However, many ORFs assigned to particular modules in both  $\phi$ B40-8 and  $\phi$ B124-14 genomes cannot be assigned a specific function due to lack of homology to any sequences in current databases, or any direct experimental evidence.

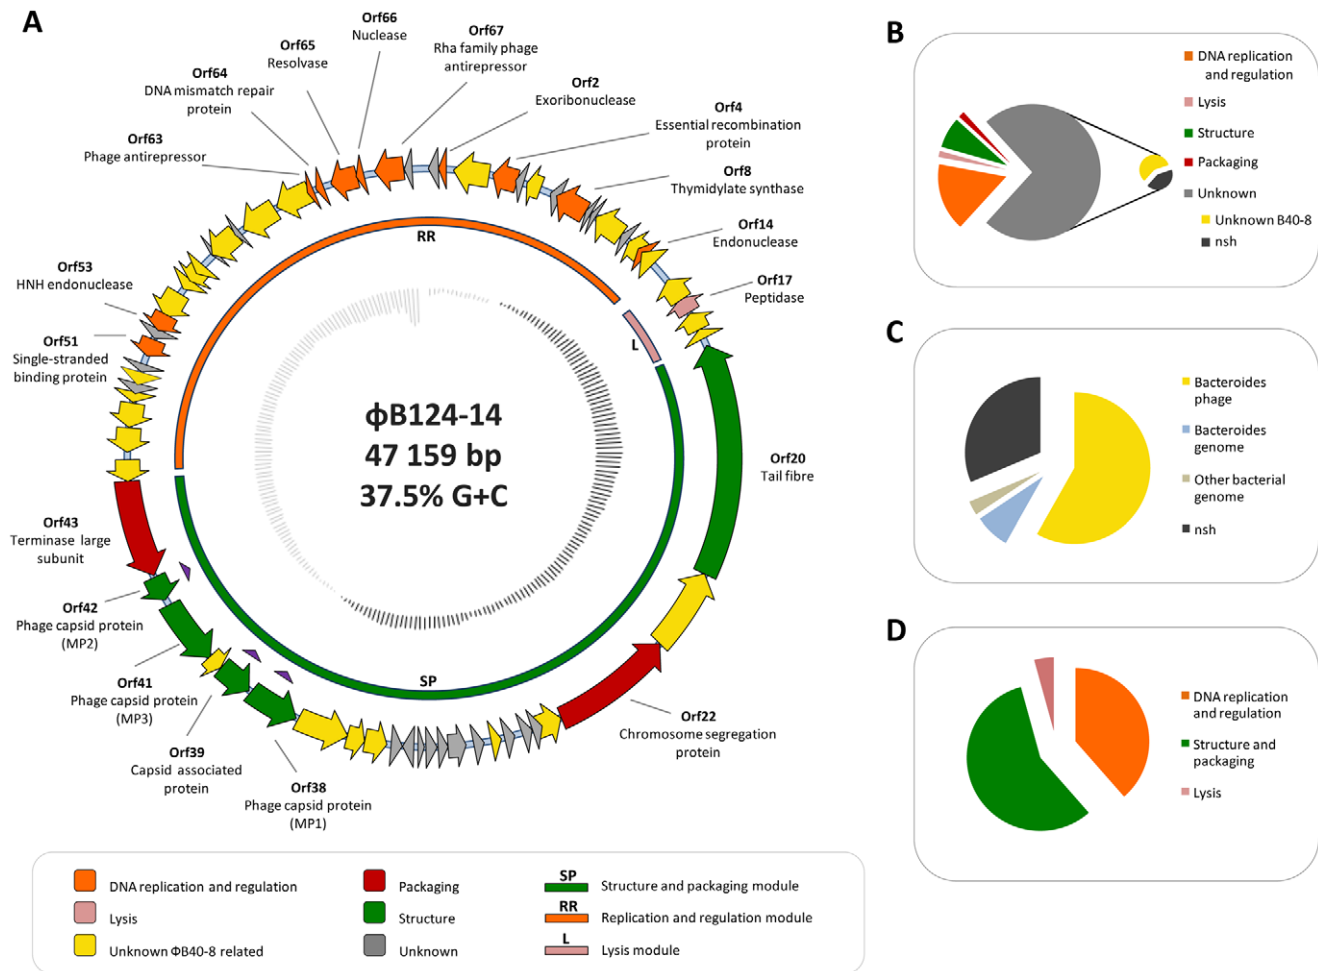

**Figure 2. Architecture and characteristics of  $\Phi$ B124-14 genome.** **A.** Physical map of  $\Phi$ B124-14 genome. **Outer track:** Position and orientation of each predicted ORF. Block arrows represent individual ORFs and indicate direction of transcription. ORF colour indicates functional assignment based on BlastP and conserved domain searches (minimum 20% identity, and an e-value of  $1e^{-5}$  or lower), as well as analysis of the phage proteome, as described in the figure legend. ORFs marked with purple triangles indicate ORF function has been confirmed through LC-MS/MS analysis of the mature phage proteome (See Figure 4). **Middle track:** Bars represent location of proposed functional gene clusters and ORFs belonging to each cluster. Colours of bars indicate putative role of each gene cluster in phage replication, based on predicted functions of member ORFs. **Inner track:** G+C content: dark grey lines = above average genome G+C content; light grey lines = below average genome G+C content. **B.** Percentage of ORFs assigned to each functional category, including unassigned ORFs. ORFs of unknown function are further broken down in a secondary pie chart to illustrate those with homologues in the other available *Bacteroides* phage genome ( $\Phi$ B40-8), and those with no significant homology (nsh) to any sequences present in public databases encompassed by the nr dataset. **C.** Percentage of  $\Phi$ B124-14 ORFs with highest homology (based on top hits by bit score in BlastP searches) to sequences of various phylogenetic origin. Only hits generating e values of  $1e^{-5}$  or lower were considered significant in this analysis. nsh – no significant homology. **D.** Illustrates the percentage of predicted ORFs assigned to each of the three predicted functional modules in the  $\Phi$ B124-14 genome. doi:10.1371/journal.pone.0035053.g002

### Structure and packaging

The  $\Phi$ B124-14 structure and packaging cluster potentially comprises 24 ORFs, constituting 52% of the phage genome (Figure 2A). Across this cluster seven ORFs could be assigned putative functions based on sequence homologies and analysis of the mature virion proteome (Table S2; Figures 2 and 4). ORFs 38, 41 and 42 are predicted to encode the main structural proteins comprising the phage capsid, and exhibit high homology to corresponding capsid proteins from  $\Phi$ B40-8 at the amino acid level (MP1 – Major Capsid Protein 1, MP3 – Major Capsid Protein 3, and MP2 – Major Protein 2, respectively; Table S2). ORF20 encodes a putative tail fibre protein, which is thought to be involved in host recognition and phage attachment [43]. However, with the exception of the predicted tail fibre protein, which exhibits homology with other proteins annotated in *Bacteroides* spp.

genome sequences, capsid proteins of both phage ( $\Phi$ B124-14 ORF38, 39, 41, 42 and corresponding  $\Phi$ B40-8 ORFs; Table S2) show no significant homology to any other sequences in BlastP searches of the nr dataset ( $e=0.03$  or greater), and all lack conserved domains found in other phage capsid proteins.

The presence of ORF38 ( $\Phi$ B40-8 Major Capsid Protein 1 homologue), and ORF42 ( $\Phi$ B40-8 Major Protein 2 homologue) in the mature virion was confirmed by analysis of the phage proteome by tandem mass spectrometry (Figure 4). Proteomic analyses also identified an additional protein within the structure and packaging cluster (encoded by ORF39) as present within the mature virion, confirming a role for this previously hypothetical protein in capsid structure (Figures 2 and 4). In contrast, ORF41 and ORF20 ( $\Phi$ B40-8 Major Capsid Protein 3 homologue and Tail Fibre homologues, respectively) were not detected in mature

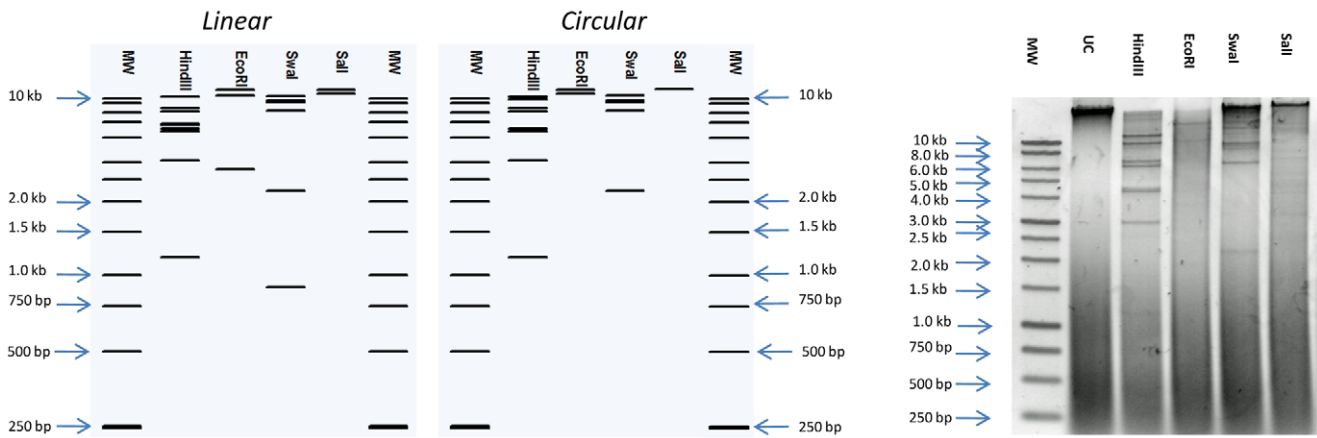

**Figure 3. Physical structure of ϕB124-14 genome.** Left and middle panels show *in silico* digest and electrophoresis to visualise restriction fragment profiles of ϕB124-14 expected for each permutation of the genome (linear or circular) generated by pDRAW32. Right panel shows results obtained from digestion of 1.5 µg of ϕB124-14 DNA (3 h at 37°C) with restriction enzymes used in *in silico* analysis. Restriction enzymes tested are indicated above each lane. MW = 1 kb Molecular Weight marker (Promega). UC = uncut ϕB124-14 DNA. doi:10.1371/journal.pone.0035053.g003

| ϕB124-14 Protein ID             | GenBank Best Hit                                               | Coverage (%) | Unique Peptides | Peptide Seq.             | XCorr | deltaCn | Charge |
|---------------------------------|----------------------------------------------------------------|--------------|-----------------|--------------------------|-------|---------|--------|
| <b>ORF 38</b><br>(Caspid, MP1)  | ϕB40-8 Major Capsid protein 1, MP1<br>(B40-8043; YP_002221581) | 32           | 12              | (K)FMDTVDKDAIAALEANK(T)  | 5.83  | 0.97    | +2     |
|                                 |                                                                |              |                 | (R)KFMDTVDKDAIAALEANK(T) | 5.32  | 1.00    | +2     |
|                                 |                                                                |              |                 | (K)IPVIDYDKNVTVSNAR(T)   | 4.90  | 0.95    | +2     |
| <b>ORF 39</b><br>(Hypothetical) | ϕB40-8 Hypothetical Protein<br>(B40-8042; YP_002221580)        | 23           | 6               | (K)ITSYISSAMQGMK(F)      | 3.63  | 1.00    | +2     |
|                                 |                                                                |              |                 | (K)EAFGIEGVTDLDLK(T)     | 3.37  | 1.00    | +2     |
|                                 |                                                                |              |                 | (K)FAELNNQLSEK(E)        | 3.24  | 1.00    | +2     |
| <b>ORF 42</b><br>(MP2)          | ϕB40-8 Major protein 2, MP2<br>(B40-8039; YP_002221577)        | 12           | 2               | (K)TAGTANTMTAESITK(L)    | 3.17  | 1.00    | +2     |
|                                 |                                                                |              |                 | (K)LATWAPLLSAR(D)        | 2.47  | 1.00    | +2     |

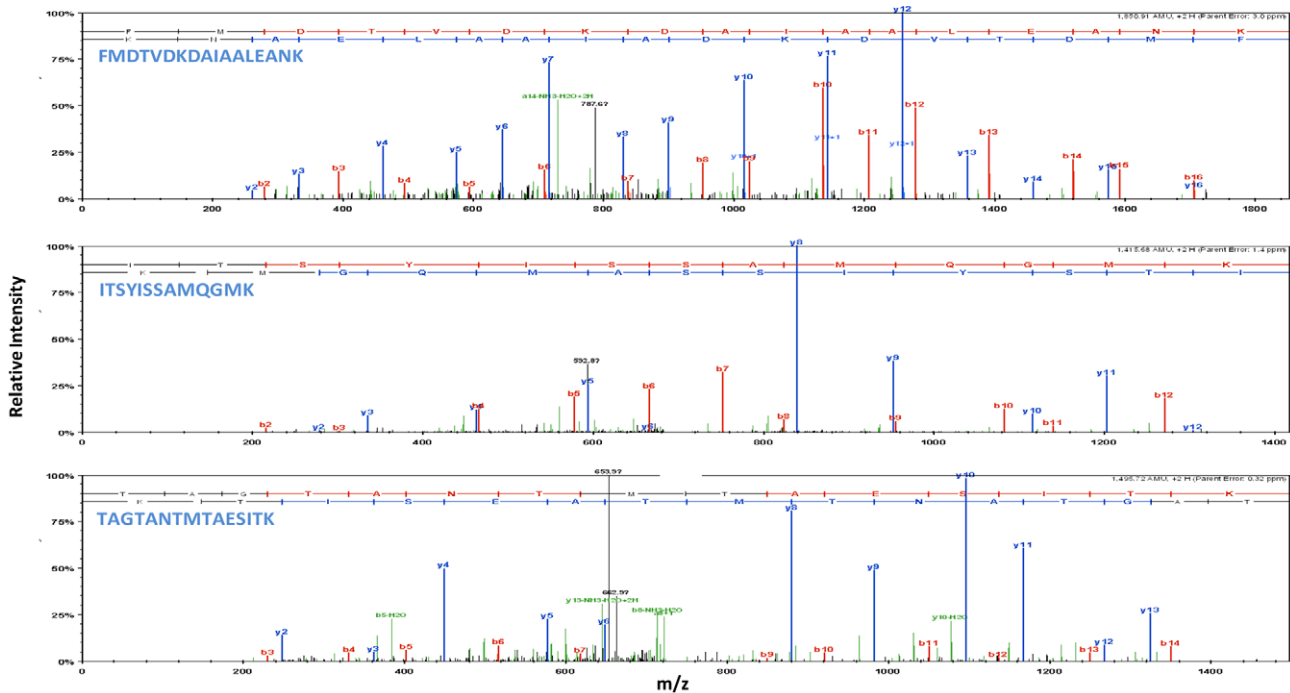

**Figure 4. Analysis of the mature ϕB124-14 proteome.** Spectra of ϕB124-14 proteins identified by tandem mass spectrometry. Example peptide spectra for each of the three proteins identified are shown. Table provides protein coverage and associated number of unique peptides matched and the sequence of the top four matches (ranked by XCorr score). doi:10.1371/journal.pone.0035053.g004

$\phi$ B124-14 phage capsids, and their role in virus capsid structure remains hypothetical.

The lack of identifiable products from ORF41 and ORF20 in the proteome of mature  $\phi$ B124-14 virions may indicate that these are present at relatively low levels that do not permit accurate identification using the proteomic techniques employed here. Although the theoretical sensitivity of the Orbitrap XL LC-MS system utilised in this study implies proteins should be detected at the low fmol range, subsets of comparatively rare proteins can be “masked” by the presence of highly abundant proteins in any given sample [44]. Alternatively, ORF41 and ORF20 may be non-functional in  $\phi$ B124-14 and could be dispensable for capsid formation, or play only transient roles in capsid assembly, potentially limited to aspects that occur *in vivo* in host cells.

In the case of ORF20, the assignment of this as a tail fibre protein is based solely on its similarity to the homologous protein annotated as a tail fibre in the  $\phi$ B40-8 genome sequence. However, a closer examination of both  $\phi$ B124-14 and  $\phi$ B40-8 proteins revealed only low levels of homology to other tail fibre proteins, with the highest homology observed with an *Enterococcus* phage phiEF24C-P2 protein annotated as a tail fibre component (32% identity, 10% query coverage,  $6e^{-10}$ ). The large size of ORF20 is more typical of tail tape measure proteins, and given the low homology to other tail fibre proteins, and the apparent absence from the phage structural proteome, the possibility that ORF20 encodes a tape measure protein rather than a tail fibre should be noted. Nevertheless, in the absence of experimental evidence demonstrating a specific function, the available genomic data indicates  $\phi$ B124-14 ORF20 to be most closely related to the  $\phi$ B40-8 putative “tail fibre” protein, and the  $\phi$ B124-14 genome has been annotated to reflect this.

**DNA replication and regulation.** ORFs assigned to the DNA replication and regulation cluster account for more than half of all those encoded by  $\phi$ B124-14 but constitute only 35% of the phage genome (Figure 2A,D). The devotion of a large number of ORFs with roles in replication and DNA synthesis is concordant with recent large-scale analyses of the human gut viral metagenome in which genes involved in nucleotide replication and synthesis were found to be enriched [6]. In addition, this is also observed in the only other publically available complete *Bacteroides* sp. phage genome,  $\phi$ B40-8 [31]. However, of the ORFs affiliated to this putative cluster, as with phage encoded ORFs in general, only a small proportion (25%) could be assigned a putative function (Figure 2A, B, C).

Of particular interest in the regulation and replication cluster is a predicted thymidylate synthase (TS; ORF8). TS is a ubiquitous enzyme in bacteria that catalyzes the formation of deoxythymidine 5'-monophosphate (dTMP) from deoxyuridine 5'-monophosphate (dUMP), which is essential for dTTP synthesis and DNA replication [45]. Based on sequence homology and conserved domain searches, the  $\phi$ B124-14 ORF8 appears to encode a ThyA type enzyme which is predicted to be utilised by ~70% of microorganisms [46], but seemingly rare in human gut viral genomes and most likely acquired from host bacterial species [6]. However, conserved domain searches indicate that the  $\phi$ B124-14 TS may also exhibit dUMP hydroxymethylase activity and thus constitute a bi-functional enzyme involved in the manufacture of modified nucleotides (Table S2). This latter function is thought to protect phage DNA from restriction-based host defence mechanisms [47].

In addition, owing to the importance of TS activity for bacterial survival, it has also been suggested that phage-encoded TS are of benefit to host bacteria [48]. The provision of additional copies of ThyA may enhance bacterial growth through gene dosing effects

as well as providing redundancy for a key activity and safeguarding against its loss [48]. Furthermore, the efficiency of thymidylate metabolism has also been implicated as a limiting factor in prokaryote genome expansion and evolution, as well as cell proliferation [46]. Overall, any enhancement in host survival ability and replication rate is also of obvious benefit to bacteriophage, since facilitating survival and replication of host bacteria will contribute directly to phage survival.

The  $\phi$ B124-14 replication and regulation module also encodes recombination proteins (ORF4) and phage antirepressors (ORF63 and 67) (Table S2; Figure 2). Phage encoded recombination proteins are often involved in facilitating recombination between the phage attP site and the attB site in the host chromosome during formation of prophage insertions [49]. Phage antirepressors are also often found in prophage elements [50], and these regulators typically control the activation and de-repression of genes required for re-entry into the lytic life cycle, often in response to changes in the physiological status of the host cells [50].

**Host lysis.** As with the previously characterised  $\phi$ B40-8 [31],  $\phi$ B124-14 lacks a well-defined lytic module, and there is a relative absence of ORFs encoding proteins with an obvious role in host cell lysis. This lack of a well-defined lytic module is also a general feature of other phages belonging to the *Siphoviridae* family [31,51]. Only one protein (ORF17), encoding a putative M15 type metalloproteinase, could be assigned a clear function potentially related to host lysis; phage-encoded peptidases are often involved in disruption of the host cell envelope [52,53]. However, ORF17 appears to form part of a small gene cluster with several ORFs of unknown function, which collectively constitute a putative lytic module (Figure 2A). Two of these putative lytic module members (ORFs 16 and 19) are predicted to encompass transmembrane signal sequences and it is possible that these function to target the encoded proteins to the cell wall or periplasm, as is often observed with holin-endolysin systems [54].

### Phage life cycle

Although the  $\phi$ B124-14 genome encodes some genes normally related to temperate life cycles (recombinases, transcriptional repressors and anti-repressors; Figure 2, Table S2), no evidence for a lysogenic cycle was indicated in previous host range analyses. The existence of  $\phi$ B124-14, or homologous elements, as prophage was investigated within currently available *Bacteroides* genome sequences using the nucleotide BLAST algorithm (Blastn). Although lytic replication of  $\phi$ B124-14 appears to be confined to only a few closely related strains of *B. fragilis* (Figure 1B), this investigation encompassed 48 available complete and draft genomes (Table S3), within the genus *Bacteroides*, including human gut-specific species. A broad range of *Bacteroides* species was included in this analysis to account for the possibility that an alternate life cycle may occur in species other than *B. fragilis*, which may not be detected under the laboratory conditions used to elucidate host range in this study.

However, no evidence for a lysogenic life cycle or the existence of  $\phi$ B124-14 as prophage was provided by this analysis, with all chromosome sequences analysed devoid of any detectable  $\phi$ B124-14-like prophage regions. Moreover, in addition to the production of clear plaques and the absence of any identifiable integrase genes, the large deviation between G+C content of the potential bacterial host *B. fragilis* (G+C~43.3%) and  $\phi$ B124-14 (G+C 37.5%) is also fitting with a lytic rather than lysogenic lifestyle [55]. Although deviation in G+C content may also be evident in lysogenic prophage, a propensity for a larger reduction in the G+C content of lytic phage, as well as the resulting increases in genome

signature differences (in terms of nucleotide repeat patterns), have been used as indicators of a lytic lifestyle [55,56]. Thus, despite the presence of genes often associated with a lysogenic cycle in other phage, there is currently no evidence to indicate  $\phi$ B124-14 undergoes a temperate life cycle. Considering also the dynamic and mosaic nature of phage genomes, in the case of  $\phi$ B124-14 genes such as anti-repressors could conceivably be remnants of previous genomic incarnations, which no longer undertake their original function.

### Comparative genome analysis of available *Bacteroides* phage sequences

Annotation and analysis of the  $\phi$ B124-14 genome sequence indicated many ORFs were homologous to predicted proteins from *Bacteroides*  $\phi$ B40-8 [31], also a member of the *Siphoviridae* family and originally isolated from an urban sewage sample [57]. In order to examine the similarity between both phage in detail, a comparative genomic analysis of the  $\phi$ B124-14 and  $\phi$ B40-8 complete genome sequences was undertaken.

Direct comparison of  $\phi$ B124-14 and  $\phi$ B40-8 complete genome nucleotide sequences using the Artemis Comparison Tool (ACT; [58]) (Figure 5A), as well as ORF-by-ORF comparison of translated amino acid sequences (Figure 5B) revealed significant homology over large areas of the phage genomes, encompassing regions believed to be involved in structure and packaging, DNA replication and regulation, and lysis, with a general conservation in gene architecture and organisation evident (Figure 5). At the nucleotide level,  $\phi$ B124-14 and  $\phi$ B40-8 are 57% identical across the complete genome sequences, with the majority of ORFs in each genome exhibiting homologues in the other (Figure 5). Concordantly, Coregenes [59] analysis, which determines the core set of genes common to two or more distinct genomes, showed that 39 of  $\phi$ B124-14 ORFs are shared with  $\phi$ B40-8 (BlastP identity of 75% or over), with structural genes displaying particularly high levels of homology (96% identity or greater, Figure 5B).

### Comparative metagenomic analysis of $\phi$ B124-14 and $\phi$ B40-8

Due to the absence of phage infecting the host strain (*B. fragilis* GB-124) from faecal samples derived from a wide range of common domestic and wild animals, and from the general environment, our previous work strongly suggested  $\phi$ B124-14 is human gut specific [20].  $\phi$ B40-8 has also been utilised as a marker of human faecal pollution and is thought to be indicative of the human gut microbiota [57]. To provide further insight into the distribution of  $\phi$ B124-14 and  $\phi$ B40-8 in various microbiomes, and evaluate their utility for the development of culture-independent faecal source tracking methods, we undertook a comparative metagenomic analysis using both complete bacteriophage genome sequences.

The general distribution of sequences with homology to  $\phi$ B124-14 and  $\phi$ B40-8 was investigated within all publically available metagenomic datasets in the NCBI metagenome database (as of June 2011, excluding those comprised solely of 16S rRNA gene sequences), as well as the microbiomes of 124 individuals of European origin which comprise the METAHIT dataset [28], 2 individuals of American origin [60], 13 Japanese individuals [8] and the viromes of 12 individuals of American descent [6].

Searches using the full length phage nucleotide sequences failed to identify metagenomic sequences with significant homology (defined as a minimum of 80% identity over 100 nucleotides or more, with an e-value of  $1e^{-5}$  or lower) to either phage in any of the available non-human gut metagenomes searched, or within the

available environmental metagenomes of aquatic and terrestrial origin. Interestingly, sequences with high homology to  $\phi$ B124-14 and  $\phi$ B40-8 were detected within the termite gut metagenome [61], but these were below the 80% identity threshold considered to be significant for the purposes of this survey ( $\leq 71\%$  identity in the termite metagenome). However, it should be noted that no dataset currently provides complete coverage of representative microbial communities and associated MGE.

The lack of homology to both phage within non-human gut metagenomes will almost certainly reflect the distribution of bacterial hosts in various microbial habitats. In the case of  $\phi$ B124-14, the narrow host range observed for this phage supports previous findings that the *B. fragilis* host strains it infects (Figure 1B) are specific to the human gut [20].

Concordantly, sequences with homology to  $\phi$ B124-14 were present in 104 of 124 (83.8%) human gut metagenomes within the MetaHIT dataset (comprised of Danish and Spanish individuals), 3 out of 13 (23%) Japanese individuals and 2 out of 12 human gut viromes (16.6%) (Figure 6A). By contrast, homologous sequences to  $\phi$ B40-8 were detected in only 11.1% of individual MetaHIT metagenomes, in only one gut metagenome of Japanese origin and no homologous sequences were found in the 12 human gut viromes searched (Figure 6A). Importantly, the observed incidence of sequences homologous to both phage was only very weakly positively correlated to the size of metagenomes ( $r^2 = 0.2$ ;  $P < 0.0001$ ; Figure 6B), indicating that observed differences in incidence are unlikely to be an artifact of differing metagenome size.

In contrast, homologous nucleotide sequences to both phages were absent from the gut metagenomes of the two American individuals [60] examined, with the search criteria employed. This is perhaps unsurprising given the lack of sequences from *Bacteroides* spp. within the metagenomic datasets generated by Gill and co-workers [60]. However, a lack of homology to both phage was also apparent in the American gut viral metagenomic dataset available on GenBank at the time of study [62]. Given that this dataset focuses on RNA viruses [62], a lack of homology to the DNA viruses  $\phi$ B124-14 and  $\phi$ B40-80, was also not unexpected. However, a general lack of homologous sequences was also apparent in the gut viral metagenomes of American origin generated by Reyes and colleagues (Figure 6A) [6].

Despite these caveats, the current observations indicate potential geographic variation in the distribution of these phage, and may also reflect inter-individual variation in actual levels of bacteriophage resident in distinct human gut microbiomes. This notion is congruent with observed differences in excretion of phage amongst the human population; with *Bacteroides* HSP40 infecting phages such as  $\phi$ B40-8 shown to be excreted by a lower number of individuals than other *B. fragilis* phages [23,63]. These differences are likely also indicative of the abundance of host strains within the human gastrointestinal tract (GIT), as well as intra-individual differences in gut viral community population structure.

### $\phi$ B124-14 ecological profiling

To further evaluate the potential utility of  $\phi$ B124-14 in broad-scale MST applications, and the putative gut specific nature of this phage (as indicated by previous studies [20,26,34] and our comparative metagenomic analysis) the relationship of  $\phi$ B124-14 with the wider bacteriophage community was explored. This was investigated using both conventional gene-centric alignment-driven phylogenetic analysis, as well as gene-independent alignment-free methodologies based on the pattern of tetranucleotide repeat frequencies encoded in the  $\phi$ B124-14 genome [51,64–65]. In particular, the latter approach facilitates large-scale

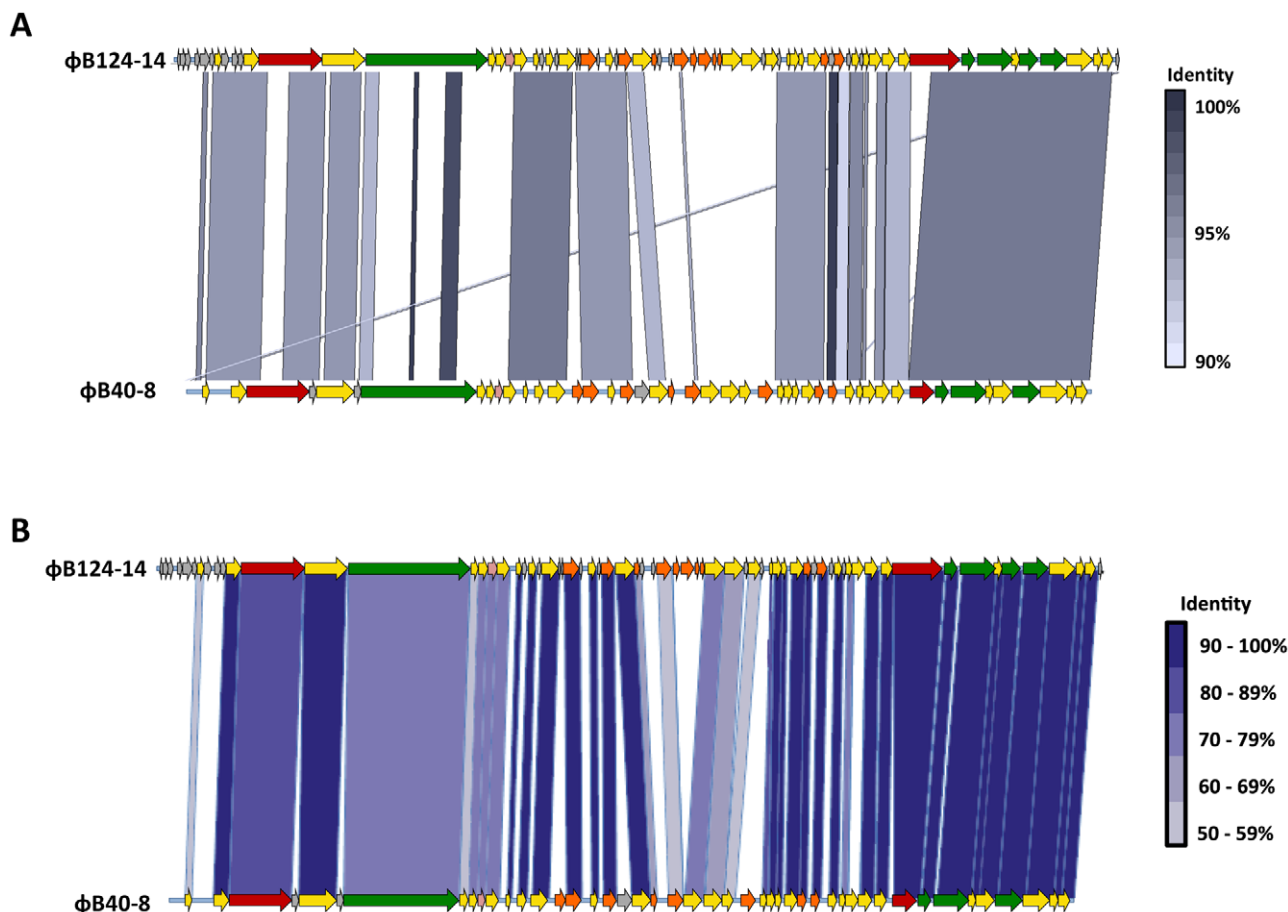

**Figure 5. Comparative genomic analysis of  $\phi$ B124-14 and  $\phi$ B40-8 (ATCC 51477-B1).** **A.** Nucleotide sequences of  $\phi$ B124-14 and  $\phi$ B40-8 were compared using the Artemis Comparison Tool (ACT). Shaded areas between linear phage genome maps represent areas of high nucleotide identity (90% or greater). Colour scale represents level of nucleotide identity at each region of homology. The ORF map for  $\phi$ B40-8 corresponds to the annotations available in the GenBank submission (FJ008913.1). For the purposes of this analysis, the  $\phi$ B124-14 genome was linearised between ORFs 29 and 30 (Figure 2, Table S2), in order to compare the circular  $\phi$ B124-14 genome with that of  $\phi$ B40-8. Colours of ORFs correspond to functional assignments as used in Figure 2. **B.** Comparison of amino acid sequences from  $\phi$ B124-14 ORFs with those annotated in the  $\phi$ B40-8 genome. Shading between arrows indicates those sharing high amino acid sequence identity. Colour scale indicates level of amino acid identity between each homologous ORF.

doi:10.1371/journal.pone.0035053.g005

analyses of nucleotide sequence affiliation and relationships, which permit a more expansive overview of  $\phi$ B124-14 ecology.

**$\phi$ B124-14 terminase based phylogeny.** Since terminases are thought to be the most highly conserved gene within phage [66], conventional phylogenetic analysis was undertaken using the putative  $\phi$ B124-14 terminase gene (ORF43) (Figure 7). Homologous amino acid sequences from phage and bacterial genomes (prophage), as well as from metagenomes of diverse origin, were aligned with the predicted large subunit terminase of  $\phi$ B124-14, and alignments used to construct phylogenetic trees. This analysis further confirmed the close association of  $\phi$ B124-14 with  $\phi$ B40-8, and also revealed a strong association with predicted terminase and terminase-like sequences originating from human gut microbiomes [8,28] and viromes [6].

As expected, the closest association was observed with terminase sequences originating from human gut-associated members of the Bacteroidetes division, including *B. fragilis* (the host species of  $\phi$ B124-14), and *Alistipes* spp. (Figure 7). In addition, the majority of terminase sequences derived from human gut metagenomes [6] represented in this tree appeared to be distinct from all other sequences retrieved from other sources (Figure 7). This latter

observation suggests the existence of additional gut-specific bacteriophage and hints at a close association between the human host, its microbiome and components of the associated mobile metagenome. However, this phylogenetic analysis was limited to sequences possessing terminase genes closely related to that of  $\phi$ B124-14, and also to those generating good alignments with the  $\phi$ B124-14 sequence. By default this excludes the majority of metagenomic virome sequences (due to the fragmentary nature of such datasets), and provides only a limited view of  $\phi$ B124-14 ecology and evolution.

**Gene-independent genome signature-based ecological profiling.** In light of the narrow view offered by gene-centric alignment-based phylogenetic methods for analysis of  $\phi$ B124-14, and the problems associated with expanding such surveys when analyzing bacteriophage genomes in general, we next explored the broader ecological landscape occupied by  $\phi$ B124-14 using gene-independent and alignment-free methods [51,64,65].

Since bacteriophage and other mobile genetic elements are believed to reflect the genomic signatures of their host bacteria (in terms of di-, tri-, and tetra-nucleotide repeat frequency (TRF) patterns; [51,67]), it would be expected that bacteriophage with



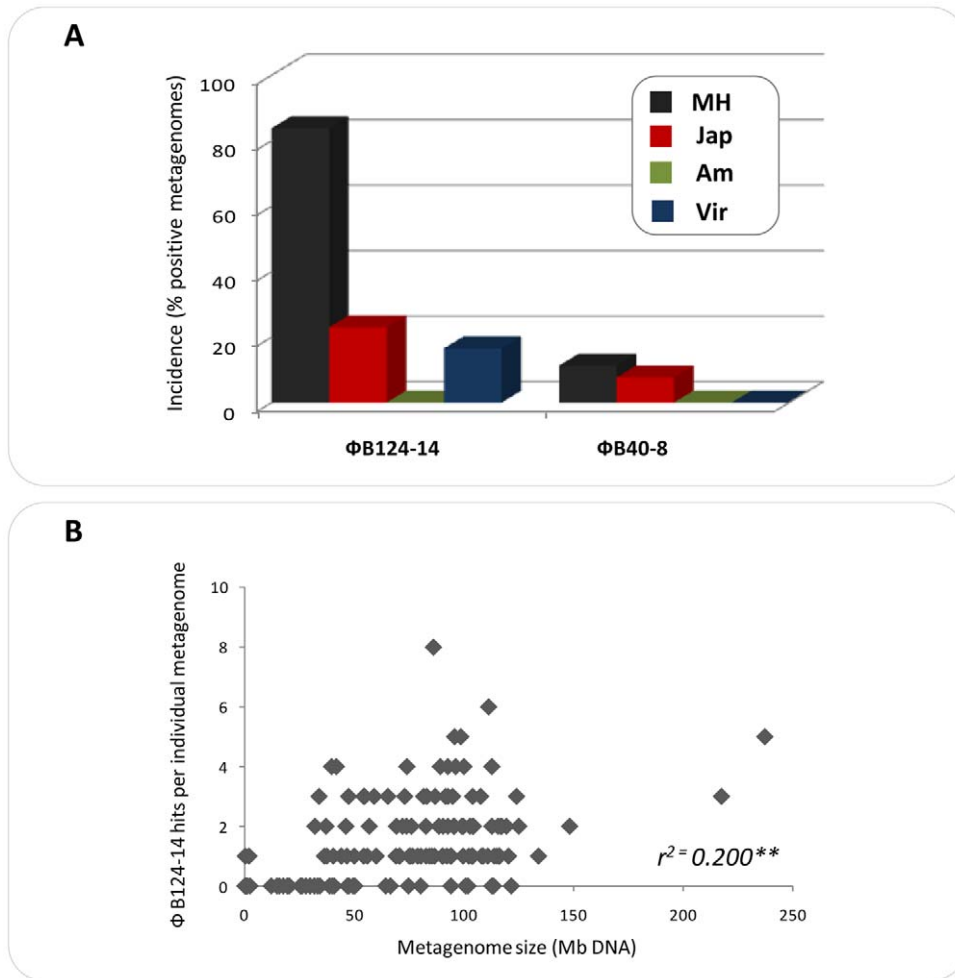

**Figure 6. Incidence of sequences homologous to ϕB124-14 and ϕB40-8 human gut metagenomes.** Percentage of individual metagenomes in which sequences homologous to ϕB124-14 or ϕB40-8 were identified ( $\geq 80\%$  identity over  $\geq 100$  nucleotides,  $1e^{-5}$  or lower). The microbial metagenomes examined were derived from individuals of European (MetaHit) [28], Japanese [8] and American [60] origin, alongside the combined viromes from 12 individuals of American descent [6]. **MH MetaHit** – All individuals represented in the MetaHit dataset; **Jap** – All individuals of Japanese origin; **AM** – All individuals of American descent; **Virome** – All viromes from individuals of American origin. **B.** Scatter plots illustrating the relationship between size of individual metagenomes searched and detection of sequences homologous to ϕB124-14.  $r^2 = 0.200^{**}$ .  $**P < 0.0001$ . doi:10.1371/journal.pone.0035053.g006

similar host ranges will exhibit comparable TRF signatures. Therefore, comparison of these TRF genetic signatures may be used to place ϕB124-14 in a wider ecological context with other bacteriophage, bacterial host species, and sequences obtained from metagenomic datasets.

To this end we compared the patterns of TRF in the genome of ϕB124-14 to those encoded in the genomes of 611 other bacteriophage, 48 chromosomal sequences from a range of *Bacteroides* species, and all large fragments ( $>10$  kb,  $n = 188$  contigs) assembled from human gut meta-viromes generated by Reyes *et al.* [6]. In light of the similarities observed between ϕB124-14 and ϕB40-8 in other analyses undertaken here, TRF scores for each bacteriophage were correlated to identify ecological similarities or differences. This not only permitted the evaluation of the effectiveness of this genetic signature-based approach but also the exploration of the extent to which the ecological landscapes populated by both phage overlap (Figure 8).

In general, results of this analysis were congruent with host range studies, comparative genomic analyses, and trends observed

from construction of terminase phylogenetic trees (Figures 1, 5 and 7). As expected, ϕB40-8 was the most closely related bacteriophage to ϕB124-14 and sequences from *B. fragilis* strains were found to be the most closely related chromosomal sequences (Figure 8A; Figure S1). A high level of correlation was observed between TRF scores derived from the comparison of each phage (ϕB124-14 and ϕB40-8) against all other sequences analyzed ( $r = 0.981$  or above; Figure 8). This high level of correlation indicates that both phage share closely related and highly similar ecological niches, in keeping with known host ranges, and the close phylogeny and evolutionary relationship observed in our other investigations (Figure 8A).

The relationship of other complete bacteriophage genomes (relative to ϕB124-14 and ϕB40-8) also exhibited a marked trend based on the broad classification of bacterial host genera and its association with the human gut microbiome (Figure 8A). The genomes of phage infecting bacterial genera commonly found in the human gut microbiome displayed a clear association relative to

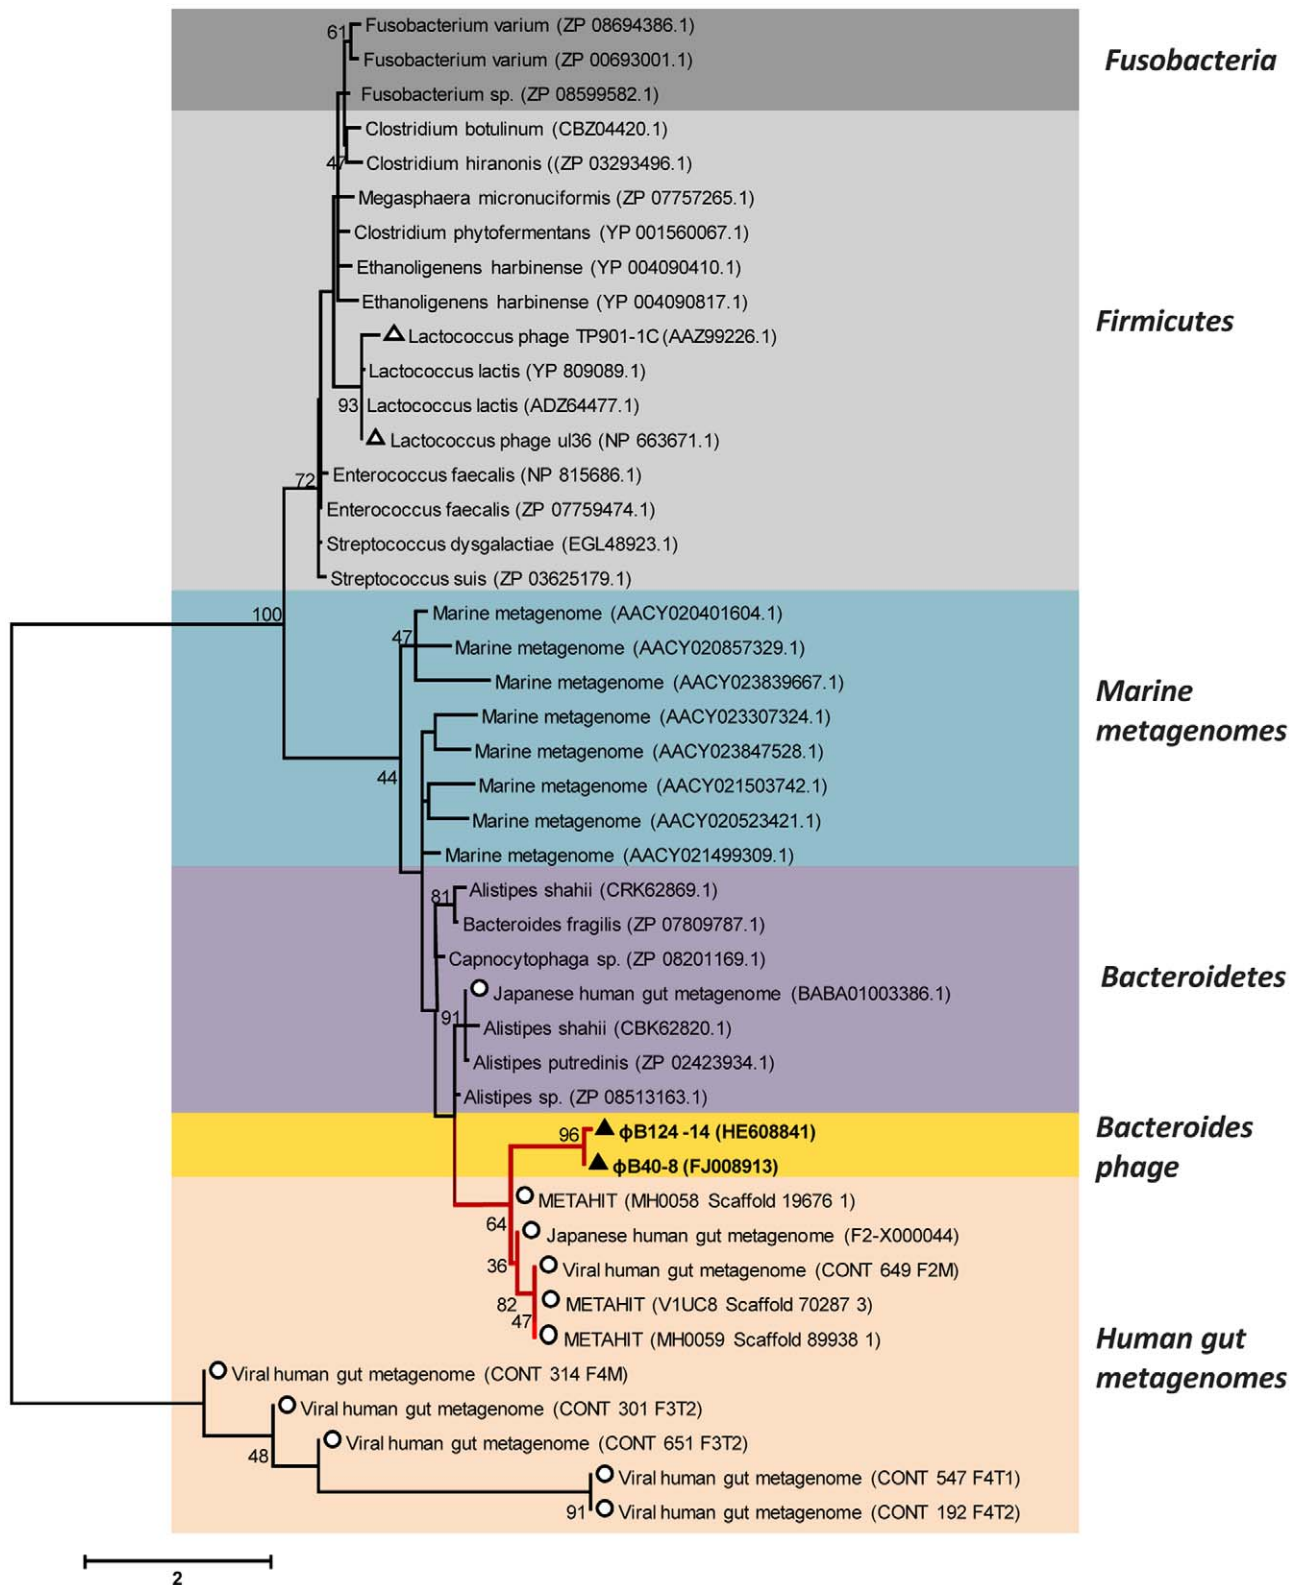

**Figure 7. Phylogeny of ΦB124-14 large subunit terminase.** Amino acid sequences homologous to ΦB124-14 terminase (ORF43), based on bit-score, were retrieved from GenBank and metagenomic datasets, including human gut microbiomes and viromes [6,8,28] and marine microbial metagenomes [92], and aligned using ClustalW. The unrooted consensus neighbour joining tree (1000 bootstrap resamplings) was produced using MEGA v5. Bootstrap values  $\geq 40$  are shown adjacent to respective tree nodes. Scale indicates amino acid substitutions. Colours indicate phylum level grouping or origin of metagenomic sequences. Black triangles indicate ΦB124-14 or ΦB40-8 terminase sequences; white triangles represent other phage sequences; white circles represent sequences originating from human gut metagenomes. doi:10.1371/journal.pone.0035053.g007

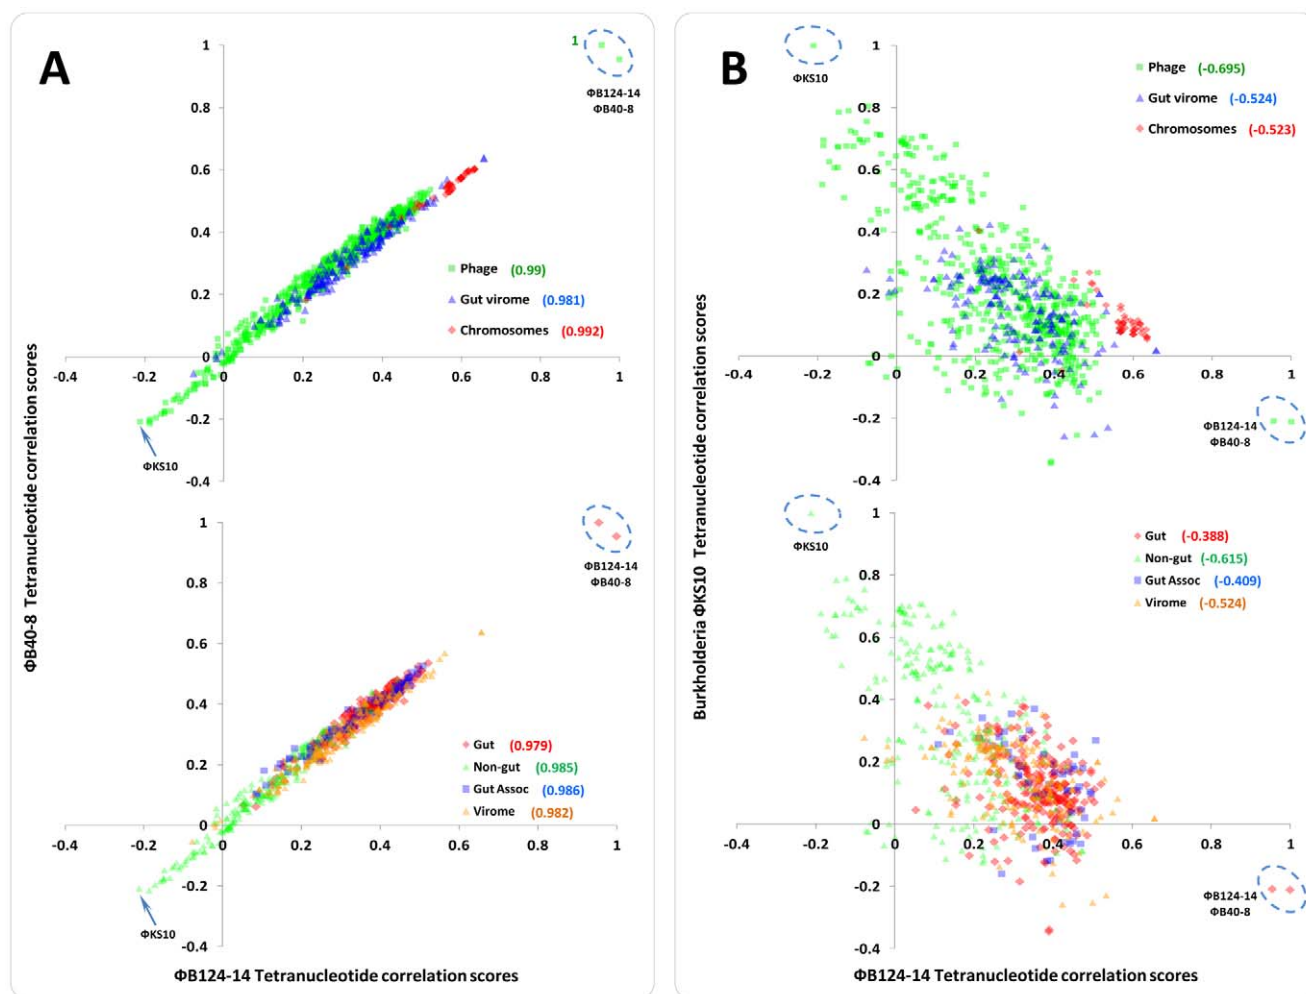

**Figure 8. Comparison of tetranucleotide repeat frequency patterns in bacteriophage genomes and ecological profiling of  $\phi$ B124-14 and  $\phi$ B40-8.** The tetranucleotide repeat frequency (TRF) correlation scores for  $\phi$ B124-14,  $\phi$ B40-8 and *Burkholderia*  $\phi$ KS10, were compared using scatter plots and correlation of data examined using the Pearson coefficient. A complete list of genomes and sequences utilised in this analysis is provided in Table S3. **A.** Comparison of TRF scores for  $\phi$ B124-14 (x-axis) vs  $\phi$ B40-8 (y-axis). **B.** Comparison of TRF scores for  $\phi$ B124-14 (x-axis) vs *Burkholderia*  $\phi$ KS10 (y-axis). **A, B. Upper charts** plot scores for all phage genomes, viral metagenome fragments, and *Bacteroides* genomes. **Phage** = TRF scores from comparisons to 611 phage and prophage genomes. **Virome** = TRF scores from comparisons to 188 large fragments (>10 Kb) from human gut viral metagenomes [6]. **Chromosome** = TRF scores from comparison to 48 *Bacteroides* spp. genome sequences. Each sequence type is represented by a different colour and symbol as indicated in the figure legends on each chart. The intensity of shading of data points reflects the number of data points represented in a given area with a greater intensity indicating more overlapping data points. Values in parentheses provide Pearson correlation scores for each sequence type. **Lower charts** plot TRF scores for sequences assigned to one of three categories based on their relation to the human gut microbiome: **Gut** = comprises bacteriophage infecting bacterial genera commonly forming part of the normal human gut microbiota. **Gut Associated** = comprises bacteriophage genomes infecting bacterial genera whose member species are associated with the gut but not generally considered to be members of the normal gut microbiota (such as primary invasive gut pathogens), or where member species are more commonly associated with environmental habitats. **Non-Gut** = contains bacteriophage infecting bacterial genera with member species not considered to be part of the human gut microbiota or typically associated with this community, and primarily encompasses bacteriophage infecting genera of environmental origin. **Virome** = All large fragments (n = 188, >10 Kb) assembled using CAMERA workflows (per individual) from human gut viral metagenomic libraries [6,91]. Each sequence category is represented by a different colour and symbol as indicated in the figure legends on each chart. For the purposes of this analysis phage infecting a particular host bacterial genus were only utilised if four or more representative phage genomes were available (540 complete phage genomes, representing 31 bacterial genera). The intensity of shading of data points reflects the number of data points represented in a given area with a greater intensity indicating more overlapping data points. Values in parentheses provide Pearson correlation scores for each sequence type. doi:10.1371/journal.pone.0035053.g008

the  $\phi$ B124-14 and  $\phi$ B40-8 genomes, forming a distinct grouping centered around the majority of gut virome sequences (Figure 8A).

In contrast, those exhibiting the least similar TRF profiles were phage infecting bacterial genera predominantly associated with terrestrial, aquatic or marine environments and not members of the normal human gut microbiota (Figure 8A). Identical analyses utilizing the  $\phi$ B124-14 genome, and that of *Burkholderia*  $\phi$ KS10

[68] (which generated the lowest TRF correlation to  $\phi$ B124-14 of all phage analyzed; Figure 8A) displayed none of the trends observed between  $\phi$ B124-14 and  $\phi$ B40-8, and exhibited only negative correlation coefficients ( $r = -0.409$  or below) with  $\phi$ B124-14 in relation to sequence categories or groups used (Figure 8B). However, even in this analysis, gut-associated phage genomes, bacterial genomes, and gut virome fragments were

observed to be much more closely affiliated with  $\phi$ B124-14, displaying a distinct trend towards the  $\phi$ B124-14 axis (Figure 8B). Collectively, these observations confirm the usefulness of the TRF approach to investigate bacteriophage ecology (Figure 8).

Despite the observed trends and phage groupings, much overlap was observed between bacteriophage assigned to different categories, an observation that is not unexpected in light of the constant ingress of “contaminants” into the gut ecosystem through consumption of food, the malleable nature of phage genomes, and the broad categories to which phage genomes were assigned in this analysis. Nevertheless, the relationships indicated here suggest that  $\phi$ B124-14 and  $\phi$ B40-8 have a strong association with the gut microbiota and occupy a distinct and largely uncharacterized ecological niche in this community.

As well as facilitating the development of novel MST tools, genomic characterization of phage infecting prominent members of the human gut community also provides fundamental insight into a fraction of the mobile metagenome that constitutes an immense and largely unexplored gene-space. This fraction of the gut microbiome is likely to encode novel activities relevant to development and functioning of the human GIT, and be of pharmaceutical or biotechnological interest in its own right [1,9]. This is particularly relevant for phages infecting members of the Bacteroidetes which constitute a major component of the human GIT microbial community [28], and have been implicated in both the onset of and protection against the development of gut-related disorders [69–71]. Given the potential for phage to shape microbial community structure and function [10–15], coupled with their highly selective nature, the isolation and characterization of gut-specific phage offer numerous possibilities for the therapeutic manipulation of the human gut microbiota, and a range of biotechnological applications including the development of novel MST tools.

In this regard the genetic characterization of  $\phi$ B124-14 has provided an essential first step in the development of culture-independent microbial source tracking tools. In particular PCR-based tools that will permit sensitive detection and quantification of human gut-specific indicators (such as  $\phi$ B124-14 DNA), will be made possible by the availability of this, and other, genome sequences of human gut-specific bacteriophage. In this regard, current efforts in developing portable, self-contained “chip” style PCR systems, for accurate and rapid diagnosis of bacterial infections at point-of-care [72–73], will translate well for microbial source tracking applications. Ultimately, such methods will eliminate the need for anaerobic culture, permitting rapid and sensitive monitoring of faecal pollution in a range of samples from surface water to shellfish.

Our analyses have also provided insight into a novel and uncharted ecological landscape within the human gut microbiome. Comparative metagenomic analysis, along with ecological profiling confirmed the gut-specific nature of  $\phi$ B124-14, corroborating our previous findings [20]. Intriguingly, this analysis also indicated that  $\phi$ B124-14 and  $\phi$ B40-8 genomes are distinct from other phage genomes and the meta-virome sequences examined here, seemingly occupying an ecological sphere of the human gut virome not represented in currently available human gut meta-viromes, and by only two phage genomes ( $\phi$ B124-14 and  $\phi$ B40-8) in public sequence databases.

In conjunction with the apparent broad geographical distribution of sequences homologous to  $\phi$ B124-14 in human gut microbiomes (observed in our comparative metagenomic analysis), this observation points to a long-term association with the human gut microbiome. In keeping with this hypothesis is the observation that both  $\phi$ B124-14 and  $\phi$ B40-8 encode functions (namely TS)

previously found to be absent from extensive viral datasets, but present in gut-associated viral metagenomes [6], and which are likely to play a role in wider metabolism and fitness of bacterial hosts. If so, such phage may also contribute to more subtle mechanisms influencing community structure and help shape this ecosystem not only through selective elimination of host species, but also through effects on host fitness and inter-strain or inter-species competition [74–76].

However, the relative lack of homologous sequences to these phage observed in comparative metagenomic analysis of American datasets, suggests that phage complements may vary between geographically distinct populations; for source tracking applications region or population specific phage may be required, a picture that is also emerging from other studies [20,26,34]. In addition, the large degree of inter-individual variation in the human gut microbiome almost certainly extends to the mobile metagenome, including the virome [6]. In this regard the goal of developing a truly universal MST will most likely require the utilization of multiple gut-specific elements, such as bacteriophage, to construct a multivalent tool capable of detecting a range of human faecal indicators.

Although much of the bacteriophage genetic landscape is exceedingly poorly characterized in the majority of microbial ecosystems investigated to date, including the human gut, here we provide a glimpse of this biological dark matter and its corresponding ecological context. Our findings suggest that the gene-space and ecological neighborhood populated by  $\phi$ B124-14 and related *Bacteroides* phage is even less well characterized than other aspects of the gut virome, and may be almost entirely uncharted at present. The availability of the complete genome sequence of this and other such phage will now permit further study of this aspect of the human gut mobile metagenome, facilitate interpretation of metagenomic datasets, as well as the development and application of novel, sensitive, and rapid culture-independent MST tools.

## Materials and Methods

### Phage, host strains and growth conditions

$\phi$ B124-14 was originally isolated from municipal wastewater and is routinely propagated on *Bacteroides* sp. GB-124, as described previously [20]. Phages were isolated by the double-agar protocol (ISO 10705-4) [77] developed specifically for *Bacteroides* phages using *Bacteroides* phage recovery medium (BPRM, per litre: meat peptone, 10 g; casein peptone, 10 g; yeast extract, 2 g; NaCl, 5 g; monohydrated l-cystein, 0.5 g; glucose, 1.8 g; MgSO<sub>4</sub>·7H<sub>2</sub>O, 0.12 g; CaCl<sub>2</sub> solution (0.05 g/ml), 1 ml; hemin, 10 ml of a 0.1% (w/v) solution made up in NaOH 0.02%; 1M Na<sub>2</sub>CO<sub>3</sub>, 25 ml; pH 6.8±0.5).

To ensure purity of  $\phi$ B124-14 isolates, agar plugs containing single  $\phi$ B124-14 plaques (zones of lysis) were picked from plates using a sterile Pasteur pipette and incubated at 4°C for 4 h in 400  $\mu$ l phage isolation buffer (19.5 mM Na<sub>2</sub>HPO<sub>4</sub>, 22 mM KH<sub>2</sub>PO<sub>4</sub>, 85.5 mM NaCl, 1 mM MgSO<sub>4</sub>, 0.1 mM CaCl<sub>2</sub>), and phage presence was retested using the double-agar method above to generate fresh plaques. This process was repeated three times and the final purified phage suspension used to generate high titre phage stocks for sequencing and other assays.

To generate high titre phage stocks, pure  $\phi$ B124-14 phage suspensions were added to 27 ml of an exponential *Bacteroides* sp. GB-124 culture (OD<sub>620</sub> 0.33; cell density of approximately  $2 \times 10^8$  colony forming units; CFU) and incubated anaerobically (according to [77]) overnight at 37°C to produce crude lysates. Phage lysates producing plaques were subsequently added to 620 ml of

GB-124 (OD<sub>620</sub> 0.33) and incubated overnight as before. Phage suspensions were then purified and concentrated using polyethylene glycol 8000 [78] as follows: NaCl was added to a final concentration of 1 M and phage suspensions were incubated for 2 h at 4°C, then centrifuged at 1800×g for 10 min to remove bacterial debris. Polyethylene glycol 8000 was added to a final concentration of 10% (w/v), mixed for 30 min, and left overnight at 4°C. Precipitated phage were collected by centrifuging at 11,000×g for 10 min at 4°C. Resulting supernatant was discarded and 30 ml of phage isolation buffer (as above) was added. Suspensions were stored at 4°C overnight, mixed gently to dissolve pellet and centrifuged at 1500×g for 10 min to remove remaining debris. Phage suspensions were filtered through a 0.2 µm polyvinylidene filter (Sartorius, UK). High titre stock suspensions of 10<sup>11</sup> plaque forming units (pfu)/ml were stored in glass vials in the dark at 4°C.

### Transmission Electron Microscopy (TEM)

Purified phage particles (10<sup>9</sup> pfu/ml) were immobilised on a 200 mesh Formvar/Carbon copper electron microscope grids (Agar Scientific, UK), and negatively stained with 1% uranyl acetate. Phage were imaged by TEM using an Hitachi-7100 TEM at 100 kV. Phage dimensions were estimated from positively stained micrographs and values reported are the mean value ± standard deviation (SD) of five virion measurements.

### Analysis of φB124-14 host range

Purified phage particles (10<sup>3</sup> pfu/ml) were tested for their ability to infect and replicate within a selection of host strains using the double agar method as previously described [77]. Plates were incubated for 24 h at 37°C, under anaerobic conditions and presence of plaques was used to indicate ability to replicate in a particular *Bacteroides* species. A number of strains previously isolated from municipal wastewaters from a variety of geographical locations [26] as well as typed *Bacteroides* spp. were tested (see Table S1 for full list of strains and species used). Novel strains were identified further by 16S rRNA gene sequencing, from 16S PCR products amplified with universal primers 27f and 1492r [79] using standard conditions. Purified PCR amplicons were sequenced directly by GATC Biotech AG (Konstanz, Germany) using Sanger sequencing, and are deposited in the EMBL database under the following accession numbers: HE608156, HE608157, HE608158, HE608159 and HE608160.

### *Bacteroides* host species phylogeny

The relationship between the φB124-14 *Bacteroides fragilis* host strain GB-124 and other *Bacteroides* species was examined in closer detail by construction of phylogenetic trees based on 16S rRNA gene sequences. In addition to those 16S sequences generated in this study, sequences homologous to the φB124-14 host species 16S rRNA were retrieved from GenBank based on best-hit Blast analysis and aligned using ClustalW [80]. Evolutionary histories were inferred by constructing consensus maximum likelihood phylogenetic trees based on the Tamura-Nei model using MEGA v5 [81]. The reliability of tree nodes was evaluated using %-age of 1,000 bootstrap resamplings, with bootstrap values ≥40% used to define well-supported clusters of 16S rRNA gene sequences.

### DNA extraction and sequencing

DNA was extracted from high titre phage stocks (10<sup>10</sup> pfu/ml), as described previously [82], with minor modifications. Briefly, each ml of phage stock was treated with DNaseI (1 µg/ml) and RNaseA (100 µg/ml) to remove contaminating bacterial DNA,

before precipitating with 2M ZnCl<sub>2</sub> (20 µl/ml) for 5 min at 37°C. Precipitate was centrifuged (1 min, 5,000×g) and resultant supernatant discarded. The remaining pellet was gently resuspended in TES buffer (0.1 M Tris-HCl, pH 8; 0.1 M EDTA; 0.3% SDS) and incubated at 60°C for 15 min. Proteins and polysaccharides were precipitated using 3 M potassium acetate (pH 5.2) on ice for 15 min, then centrifuged for 1 min at 8,000×g. DNA in the resultant supernatant was precipitated with isopropanol and centrifuged. The resulting DNA pellet was washed with 70% ethanol, air dried at room temperature and resuspended in 20 µl Tris-EDTA buffer (10 mM Tris-HCl, pH 8; 1 mM EDTA). The complete genome sequence of φB124-14 was obtained by pyrosequencing using a Roche GS FLX with Titanium chemistry. A total of 16,952 reads with an average length of 355 nt were generated and assembled using the GS De Novo Assembler. The final assembly provided average sequence coverage of ~127× for the φB124-14 genome. All sequencing and genome assembly was conducted by GATC Biotech AG (Konstanz, Germany). Genome size was confirmed by restriction digest and agarose gel electrophoresis, and fragment sizes calculated using Gene Tools software (Syngene, UK). The complete φB124-14 genome has been deposited in the EMBL database under the following accession number: HE608841.

### Annotation and bioinformatic analyses of φB124-14 genome

Open reading frames (ORFs) encoded by φB124-14 were predicted using Glimmer (v3) [83], and annotated using Artemis [84]. The putative function of predicted ORFs were assigned based on homologies to proteins and protein conserved domains identified in BlastP and tBlastn [85] searches against the NCBI-nr, and Conserved Domains Database (CDD; encompassing all NCBI entries plus protein models from Pfam, SMART, COG, PRK and TIGRFAM, and ACLAME databases), respectively.

For BlastP and tBlastn searches only homologous sequences generating e-values of lower than 1e<sup>-5</sup> at ≥20% identity were considered significant. For Conserved Domain searches, only hits with an e-value of 0.01 or lower were considered significant. Putative tRNA-encoding genes were searched for using tRNAscan-SE [86]. Transmembrane proteins and signal peptides were predicted using the TMHMM v2 [87] and SignalP v3 [88] servers. The presence of prophage with homology to φB124-14 and φB40-8 in complete bacterial genome sequences were predicted using Prophinder [89] and Blastn analysis of *Bacteroides* genomes available within GenBank (See Table S3 for list of genomes). Comparative analysis of bacteriophage genomes was carried out using the Artemis Comparison Tool (ACT) [58]. Physical maps of the annotated φB124-14 and φB40-8 genomes were generated using Vector NTI Advance (v11.5).

### Physical structure of phage genome

Phage genomic DNA was digested with HindIII, EcoRI (Promega, UK), SmaI and SalI (NEB, UK), respectively, for 3 h at 37°C and fragments resolved on a 0.8% Tris Acetate EDTA (TAE) gel at 80 V for 3 h. Resulting restriction fragment profiles were compared to *in silico* restriction profiles for linear or circular permutations of the genome, which were generated by pDRAW32 (<http://www.acaclone.com/>).

### Analysis of the φB124-14 proteome

φB124-14 lysate (10<sup>11</sup> pfu/ml) was filtered through a sterile 0.2 µm low protein binding filter (HT Tuffryn, Pall Corp.) to remove cell debris. Resulting crude protein extract was diluted

with an equal volume of 2,2,2-Trifluoroethanol (Fluka), 20 mM DTT, and denatured and reduced at 60°C for 60 min, before alkylation with 30 mM IAA at room temperature in the dark for 45 min. The sample was diluted 6-fold with 50 mM ammonium bicarbonate and digested with sequencing grade trypsin (Promega, UK) overnight at 37°C. Tryptic peptides were fractionated on a 250 mm × 0.075 mm reverse phase column (Acclaim PepMap100, C18, Dionex) using an Ultimate U3000 nano-LC system (Dionex) and a 2 h linear gradient from 95% solvent A (0.1% formic acid in water) and 5% B (0.1% formic acid in 95% acetonitrile) to 50% B at a flow rate of 250 nL/min. Eluting peptides were directly analysed by tandem mass spectrometry using a LTQ Orbitrap XL hybrid FTMS (ThermoScientific) and derived MS/MS data searched against  $\phi$ B124-14 amino acid sequences using Sequest version SRF v. 5 as implemented in Bioworks v 3.3.1 (Thermo Fisher Scientific), assuming carboxyamidomethylation (Cys), deamidation (Asn and Gln) and oxidation (Met) as variable modifications. Filtering criteria used for positive protein identifications are Xcorr values greater than 1.9 for +1 spectra, 2.2 for +2 spectra and 3.75 for +3 spectra and a delta correlation (DCn) cut-off of 0.1.

### Comparative metagenomic analysis

Comparative metagenomic analysis were conducted as previously described [1,4,90]. The presence of  $\phi$ B124-14 and  $\phi$ B40-8-like sequences among available metagenomes was investigated in the first instance using the full set of microbial metagenomes of diverse origin available within the NCBI database (158 metagenomes, June 2011). A more detailed investigation of the distribution of  $\phi$ B124-14 and  $\phi$ B40-8-like sequences within the 124 human gut microbial metagenomes from individuals of European descent represented in the METAHIT dataset [28], 13 individuals of Japanese origin [8], 2 individuals of American origin [60] and within the viral metagenomes from 12 individuals of American descent [6] was then carried out. To obtain assemblies of viral gut metagenomes for these analyses, pyrosequencing reads for project SRA012183 [6] were obtained from the NCBI Short Read Archive and processed using CAMERA workflows [91]. Reads were filtered to remove low quality reads and duplicates using the 454 QC and 454 Duplicate Clustering workflows, respectively, with default parameters. The resulting high-quality, non-redundant data sets were assembled using the CAMERA Meta-Assembler which combines output from seven independent short read assemblers run using pre-optimised parameters: Newbler, Taipan, Celera, Velvet, SOAPdenovo, ABySS and SSAKE [91]. Individual metagenomes were processed separately. The combined metagenomes from each dataset (MetaHIT, Japanese gut, American gut and gut viral) were searched using Blastn for nucleotide sequences with homology to  $\phi$ B124-14 and  $\phi$ B40-8. Only sequences exhibiting an identity of 80% or greater over 100 bp or longer at  $1e^{-5}$  or lower were considered significant and used to calculate incidence of positive metagenomes as described previously [1,4]. Correlation analysis (Scatter plots and Pearson correlation co-efficient) was carried out using Microsoft Excel.

### Ecological profiling of $\phi$ B124-14

Alignment-driven phylogenetics was undertaken using the  $\phi$ B124-14 terminase gene amino acid sequence. Homologous sequences, based on top bit scores, were identified in metagenomic datasets of human gut and marine origin [6,8,28,60,92], as well as through BlastP searches of the nr dataset. Sequences were aligned using ClustalW and the Neighbour-Joining method with the Jones-Taylor-Thornton matrix model for protein distance, used to construct phylogenetic trees using MEGA v5 [81]. Alignment-free

analysis, based on the TRF patterns encoded in microbial and bacteriophage genomes, was used to investigate the broader relationship of  $\phi$ B124-14 with the wider phage community, and host bacterial species. Correlations between frequencies of all 256 possible tetranucleotide sequences in all phage genome sequences available in GenBank (611 phage genome sequences as of October 2011), a wide range of *Bacteroides* spp. genomes (48 genome sequences, obtained from GenBank, The Broad Institute – <http://www.broadinstitute.org>; and the Washington University Genome Institute – <http://www.genome.wustl.edu>), as well as all large metagenomic fragments (>10 kb) assembled from the human gut viral datasets generated by Reyes and colleagues [6], were calculated according to the method of Teeling and colleagues, using the standalone TETRA 1.0 program [65]. Draft *Bacteroides* chromosomal sequences were also included in this analysis and for each draft genome contigs were first concatenated before processing using TETRA (concatenation was confirmed not to obscure the inherent tetranucleotide genomes signature in draft genomes processed this way; Figure S2). All sequences entered into the TETRA standalone program were extended by their reverse complement and used by the program to calculate observed and expected TRFs [65]. The divergence between observed and expected frequencies for each tetranucleotide pattern were subsequently converted to Z-scores which were compared pairwise between all sequences to generate a Pearson similarity matrix of TRF patterns.

### Supporting Information

**Figure S1 Details of closest sequences to  $\phi$ B124-14 by tetra score.** For each sequence type represented (phage, virome, chromosome), the top six closest sequences to  $\phi$ B124-14 by tetranucleotide repeat frequency (TRF) score are indicated by numerals on the scatter plot, and colours correspond to sequence types (as detailed in chart legend). The table provides the names and TRF correlation values against the  $\phi$ B124-14 genome for each sequence indicated, arranged by sequence type. In the case of complete phage genome sequences, the closest sequence to  $\phi$ B124-14 is  $\phi$ B40-8 and vice versa. (TIF)

**Figure S2 Comparison of tetranucleotide correlation scores for complete and draft concatenated genomes.** To verify that concatenation of draft genomes, and the unfinished nature of these datasets did not corrupt the tetranucleotide genome signatures of these genomes, complete and draft genomes for several *Bacteroides* species were compared. It is expected that such strains would exhibit a high level of correlation between tetranucleotide genome signatures. Scatter plots indicate that concatenated draft genomes retain their tetranucleotide signature, with perfect correlation observed in all comparisons, in contrast to negative control plots between the distantly related *Bacteroides vulgatus* and *Bifidobacterium longum* genomes. A. *B. thetaiotaomicron* VPI-5483 complete genome vs *B. thetaiotaomicron* 3330-1 draft concatenated genome. B. *B. vulgatus* ATCC 8482 complete genome vs *B. vulgatus* 1\_0 draft concatenated genome. C. *B. fragilis* YCH46 complete genome vs *B. fragilis* 3\_1\_12\_1 draft concatenated genome. D. Negative control plot, *B. fragilis* YCH46 vs *Bifidobacterium longum* DJO10A. Corr = Correlation score. (TIF)

**Table S1 Origin of species and strains used in  $\phi$ B124-14 host range assays<sup>1</sup>.** <sup>1</sup> highly related *B. fragilis* strains used for tree construction (Figure 1B) also included. NT – not tested. (DOCX)

**Table S2.  $\phi$ B124-14 predicted ORFs and putative functional assignments.** <sup>1</sup> ORF numbers and functional assignments correspond to those represent on genetic maps of the  $\Phi$ B124-14 genome presented in **Figure 2**. <sup>2</sup> ORFs were assigned roles relating to broad functions based on results of BlastP and conserved domain searches of translated ORF amino acid sequences. (DOCX)

**Table S3 Bacterial chromosomes, phage genomes and metagenomic fragments used in phage phylogenetic analyses and ecological profiling (Figures 7 and 8).** **1 – Classification**, refers to classification of genomes used for ecological profiling in **Figure 8B**. Genomes from phage infecting host bacteria belonging from a particular genus were assigned one of three broad categories based on the relationship of bacterial host genus with the human gut microbiota. For the purposes of this analysis only bacteriophage with 4 or more representatives infecting a particular genus of bacteria were included (540 complete phage genomes, representing 31 bacterial genera). **G = Gut**, constitutes bacteriophage infecting genera commonly forming part of the normal human gut microbiota as well as all large fragments (>10 Kb) assembled using CAMERA workflows from human gut viral metagenomic libraries (Reyes *et al* 2010, *Nature* 466: 334–338 [6]). **GA = Gut Associated**, contains bacteriophage genomes infecting genera with member species associated with the gut but not considered to be members of the normal microbiota (such as primary invasive gut pathogens), and/or contain member species more commonly associated with environmental habitats. **NG = Non-Gut**, contains bacteriophage infecting genera with member species not considered to be members of the human gut microbiota or typically associated with this community. Primarily encompasses bacteriophage infecting genera of environmental origin. **2 – Source**, indicates the source of bacterial and bacteriophage genomes utilised in this study: **NCBI** – Complete bacteriophage genomes were obtained from the NCBI Viruses home page (TaxID: 10239) and all genomes present as of Oct 18th 2011 were downloaded using the Viral homepage ftp. Complete finished *Bacteroides* genomes were obtained from the NCBI Prokaryotes genome homepage and downloaded individually. • NCBI Viral Homepage: <http://www.ncbi.nlm.nih.gov/genomes/GenomesHome.cgi?taxid=10239>; • NCBI Viral FTP: <ftp://ftp.ncbi.nih.gov/refseq/release/viral/>; •

NCBI Prokaryote Homepage: <http://www.ncbi.nlm.nih.gov/genomes/lproks.cgi>. **NCBI SRA** –Pyrosequencing reads generated from metagenomic libraries of virus-like particles by Reyes *et al.* (2010) [6], were obtained from the NCBI Short read archive, project SRA012183 (<http://www.ncbi.nlm.nih.gov/sra>). Reads were subsequently processed for quality and assembled using CAMERA workflows (<https://portal.camera.calit2.net/gridsphere/gridsphere>). **Broad Inst = Broad Institute**. Draft *Bacteroides spp.* genomes sequenced as part of the Human Microbiome Project (Nelson *et al* 2010 *Science* 328 (5981):994–999) at the Broad Institute were downloaded from the Bacteroides group Sequencing project page: • Broad Institute homepage (<http://www.broadinstitute.org/>); • Bacteroides Sequencing Group Project Page ([http://www.broadinstitute.org/annotation/genome/bacteroides\\_group/MultiDownloads.html](http://www.broadinstitute.org/annotation/genome/bacteroides_group/MultiDownloads.html)); • Human Microbiome Project Homepage ([http://genome.wustl.edu/projects/human\\_microbiome\\_project/human\\_gut\\_microbiome](http://genome.wustl.edu/projects/human_microbiome_project/human_gut_microbiome)). **WUGC = Washington University Genome Centre**. Draft *Bacteroides* genomes sequenced as part of the Human Gut Microbiome Project were also obtained from the Washington University Sequencing Centre, Human Microbiome Project website. • HGM Home page: [http://genome.wustl.edu/projects/human\\_microbiome\\_project/human\\_microbiome\\_project\\_description](http://genome.wustl.edu/projects/human_microbiome_project/human_microbiome_project_description). • Genomes: [http://genome.wustl.edu/genomes/human\\_gut\\_microbiome\\_genomes](http://genome.wustl.edu/genomes/human_gut_microbiome_genomes). (DOCX)

## Acknowledgments

We thank Dr. Cormac Gahan and Dr. Caroline Jones for critical discussion of the manuscript, and also wish to acknowledge and thank the research groups whose data we have analysed as part of this study, for making this publically available: Human gut viral metagenomes were generated by Reyes and colleagues [6]; Draft genomes of *Bacteroides* species sequenced as part of the Human Gut Microbiome project were obtained from the “*Bacteroides* group sequencing project” at the Broad Institute (<http://www.broadinstitute.org/>), and the Washington University Genome Institute (<http://www.genome.wustl.edu>).

## Author Contributions

Conceived and designed the experiments: BVJ JC LO LB JE. Performed the experiments: LO CD BVJ JE LB DD HT JC. Analyzed the data: LO BVJ LB EC. Wrote the paper: LO BVJ.

## References

- Jones BV (2010) The human gut mobile metagenome: a metazoan perspective. *Gut Microbes* 1: 415–31.
- Jones BV, Marchesi JR (2007) Accessing the mobile metagenome of the human gut microbiota. *Mol Biosyst* 3: 749–58.
- Jones BV, Marchesi JR (2007) Transposon-aided capture (TRACA) of plasmids resident in the human gut mobile metagenome. *Nat Methods* 4: 55–61.
- Jones BV, Sun F, Marchesi JR (2010) Comparative metagenomic analysis of plasmid encoded functions in the human gut microbiome. *BMC Genomics* 11: 46.
- Hehemann J-H, Correc G, Barbeyron T, Helbert W, Czjzek M, et al. (2010) Transfer of carbohydrate-active enzymes from marine bacteria to Japanese gut microbiota. *Nature* 464: 908–12.
- Reyes A, Haynes M, Hanson N, Angly FE, Heath AC, et al. (2010) Viruses in the faecal microbiota of monozygotic twins and their mothers. *Nature* 466: 334–8.
- Zaneveld JR, Lozupone C, Gordon JI, Knight R (2010) Ribosomal RNA diversity predicts genome diversity in gut bacteria and their relatives. *Nucleic Acids Res* 38: 3869–79.
- Kurokawa K, Itoh T, Kuwahara T, Oshima K, Toh H, et al. (2007) Comparative metagenomics revealed commonly enriched gene sets in human gut microbiomes. *DNA Res* 14: 169–81.
- Ogilvie LA, Firouzmand S, Jones BV (2012) Evolutionary, ecological, and biotechnological perspectives on plasmids resident in the human gut mobile metagenome. *Bioengineered Bugs* 3: 13–31.
- Breitbart M, Hewson I, Felts B, Mahaffy JM, Nulton J, et al. (2003) Metagenomic analyses of an uncultured viral community from human feces. *J Bacteriol* 185: 6220–3.
- Barr JJ, Slater FR, Fukushima T, Bond PL (2010) Evidence for bacteriophage activity causing community and performance changes in a phosphorus-removal activated sludge. *FEMS Microbiol Ecol* 74: 631–42.
- Roucourt B, Lavigne R (2009) The role of interactions between phage and bacterial proteins within the infected cell: a diverse and puzzling interactome. *Environ Microbiol* 11: 2789–805.
- Gomez P, Buckling A (2011) Bacteria-phage antagonistic coevolution in soil. *Science* 332: 106–9.
- Shapiro OH, Kushmaro A, Brenner A (2010) Bacteriophage predation regulates microbial abundance and diversity in a full-scale bioreactor treating industrial wastewater. *ISME J* 4: 327–36.
- Sandaa R-A, Gómez-Consarnau L, Pinhassi J, Riemann L, Malits A, et al. (2009) Viral control of bacterial biodiversity-evidence from a nutrient-enriched marine mesocosm experiment. *Environ Microbiol* 11: 2585–97.
- Hanlon GW (2007) Bacteriophages: an appraisal of their role in the treatment of bacterial infections. *Int J Antimicrob Agents* 30: 118–28.
- Górski A, Wazna E, Dabrowska B-W, Dabrowska K, Switala-Jeleń K, et al. (2006) Bacteriophage translocation. *FEMS Immunol Med Microbiol* 46: 313–9.
- Rohwer F, Prangishvili D, Lindell D (2009) Roles of viruses in the environment. *Environ Microbiol* 11: 2771–4.

19. Lepage P, Colombet J, Marteau P, Sime-Ngando T, Doré J, et al. (2008) Dysbiosis in inflammatory bowel disease: a role for bacteriophages? *Gut* 57: 424–5.
20. Ebdon J, Muniesa M, Taylor H (2007) The application of a recently isolated strain of Bacteroides (GB-124) to identify human sources of faecal pollution in a temperate river catchment. *Water Res* 41: 3683–90.
21. Nnane DE, Ebdon JE, Taylor HD (2011) Integrated analysis of water quality parameters for cost-effective faecal pollution management in river catchments. *Water Res* 45: 2235–46.
22. Gómez-Doñate M, Payán A, Cortés I, Blanch AR, Lucena F, et al. (2011) Isolation of bacteriophage host strains of Bacteroides species suitable for tracking sources of animal faecal pollution in water. *Environ Microbiol* 13: 1622–31.
23. Puig A, Queralt N, Jofre J, Araujo R (1999) Diversity of Bacteroides fragilis strains in their capacity to recover phages from human and animal wastes and from fecally polluted wastewater. *Appl Environ Microbiol* 65: 1772–6.
24. Blanch AR, Belanche-Muñoz L, Bonjoch X, Ebdon J, Gantzer C, et al. (2006) Integrated analysis of established and novel microbial and chemical methods for microbial source tracking. *Appl Environ Microbiol* 72: 5915–26.
25. Lee JE, Lim MY, Kim SY, Lee S, Lee H, et al. (2009) Molecular characterization of bacteriophages for microbial source tracking in Korea. *Appl Environ Microbiol* 75: 7107–14.
26. Payan A, Ebdon J, Taylor H, Gantzer C, Ottoson J, et al. (2005) Method for isolation of Bacteroides bacteriophage host strains suitable for tracking sources of fecal pollution in water. *Appl Environ Microbiol* 71: 5659–62.
27. Scott TM, Rose JB, Jenkins TM, Farrah SR, Lukaski J (2002) Microbial source tracking: current methodology and future directions. *Appl Environ Microbiol* 68: 5796–803.
28. Qin J, Li R, Raes J, Arumugam M, Burgdorf KS, et al. (2010) A human gut microbial gene catalogue established by metagenomic sequencing. *Nature* 464: 59–65.
29. Ley RE, Peterson D a, Gordon JI (2006) Ecological and evolutionary forces shaping microbial diversity in the human intestine. *Cell* 124: 837–48.
30. Queralt N, Jofre J, Araujo R, Muniesa M (2003) Homogeneity of the morphological groups of bacteriophages infecting Bacteroides fragilis strain HSP40 and strain RYC2056. *Curr Microbiol* 46: 163–8.
31. Hawkins SA, Layton AC, Ripp S, Williams D, Sayler GS (2008) Genome sequence of the Bacteroides fragilis phage ATCC 51477-B1. *Virology* 5: 97.
32. Stackebrandt E, Frederiksen W, Garrity GM, Grimont PAD, Kämpfer P, et al. (2002) Report of the ad hoc committee for the re-evaluation of the species definition in bacteriology. *Int J Syst Evol Microbiol* 52: 1043–7.
33. Bergan T, Hovig B (1968) A new species, Sphaerophorus intermedius, isolated from empyema. *Acta Pathol Microbiol Scand* 74: 421–30.
34. Vijayavel K, Fujioka R, Ebdon J, Taylor H (2010) Isolation and characterization of Bacteroides host strain HB-73 used to detect sewage specific phages in Hawaii. *Water Res* 44: 3714–24.
35. Xu J, Mahowald MA, Ley RE, Lozupone CA, Hamady M, et al. (2007) Evolution of symbiotic bacteria in the distal human intestine. *PLoS Biol* 5: e156.
36. Kunin V, He S, Warnecke F, Peterson SB, Garcia Martin H, et al. (2008) A bacterial metapopulation adapts locally to phage predation despite global dispersal. *Genome Res* 18: 293–7.
37. Tyson GW, Banfield JF (2008) Rapidly evolving CRISPRs implicated in acquired resistance of microorganisms to viruses. *Environ Microbiol* 10: 200–7.
38. Linderoth NA, Ziermann R, Haggård-Ljungquist E, Christie GE, Calendar R (1991) Nucleotide sequence of the DNA packaging and capsid synthesis genes of bacteriophage P2. *Nucleic Acids Res* 19: 7207–14.
39. Pruss GJ, Wang JC, Calendar R (1975) In vitro packaging of covalently closed circular monomers of bacteriophage DNA. *J Mol Biol* 98: 465–78.
40. Johnson ZI, Chisholm SW (2004) Properties of overlapping genes are conserved across microbial genomes. *Genome Res* 14: 2268–72.
41. Chirico N, Vianelli A, Belshaw R (2010) Why genes overlap in viruses. *Proc R Soc B* 277: 3809–17.
42. Rohwer F (2003) Global phage diversity. *Cell* 113: 141.
43. Haggård-Ljungquist E, Halling C, Calendar R (1992) DNA sequences of the tail fiber genes of bacteriophage P2: evidence for horizontal transfer of tail fiber genes among unrelated bacteriophages. *J Bacteriol* 174: 1462–77.
44. Martosella J, Zolotarjova N, Liu H, Nicol G, Boyes BE (2005) Reversed-phase high-performance liquid chromatographic pre-fractionation of immunodepleted human serum proteins to enhance mass spectrometry identification of lower-abundant proteins. *J Proteome Res* 4: 1522–37.
45. Carreras CW, Santi DV (1995) The catalytic mechanism and structure of thymidylate synthase. *Ann Rev Biochem* 64: 721–62.
46. Escartin F, Skouloubris S, Liebl U, Myllykallio H (2008) Flavin-dependent thymidylate synthase X limits chromosomal DNA replication. *Proc Natl Acad Sci USA* 105: 9948–52.
47. Warren RA (1980) Modified bases in bacteriophage DNAs. *Ann Rev Microbiol* 34: 137–58.
48. Stern A, Mayrose I, Penn O, Shaul S, Gophna U, et al. (2010) An evolutionary analysis of lateral gene transfer in thymidylate synthase enzymes. *Sys Biol* 59: 212–25.
49. Groth AC, Calos MP (2004) Phage integrases: biology and applications. *J Mol Biol* 335: 667–78.
50. Birge EA (2000) Bacterial and Bacteriophage Genetics. 4th ed. New York: Springer Verlag. 559 p.
51. Duhaime MB, Wichels A, Waldmann J, Teeling H, Glöckner FO (2011) Ecogenomics and genome landscapes of marine Pseudoalteromonas phage H105/1. *ISME J* 5: 107–21.
52. Mikoulskaia GV, Odnokova IV, Zimin AA, Lysanskaya VY, Feofanov SA, et al. (2009) Identification and characterization of the metal ion-dependent L-alanyl-D-glutamate peptidase encoded by bacteriophage T5. *FEBS J* 276: 7329–42.
53. Waldor MK (2005) Phages: their role in bacterial pathogenesis and biotechnology. Washington, DC: ASM Press. 450 p.
54. Borysowski J, Weber-Dabrowska B, Górski A (2006) Bacteriophage endolysins as a novel class of antibacterial agents. *Exp Biol Med* 231: 366–77.
55. Rocha EPC, Danchin A (2002) Base composition bias might result from competition for metabolic resources. *Trends Genet* 18: 291–4.
56. Deschavanne P, DuBow MS, Regeard C (2010) The use of genomic signature distance between bacteriophages and their hosts displays evolutionary relationships and phage growth cycle determination. *Virology* 7: 163.
57. Tartera C, Jofre J (1987) Bacteriophages active against Bacteroides fragilis in sewage-polluted waters. *Appl Environ Microbiol* 53: 1632–7.
58. Carver TJ, Rutherford KM, Berriman M, Rajandream M-A, Barrell BG, et al. (2005) ACT: the Artemis Comparison Tool. *Bioinformatics* 21: 3422–3.
59. Zafar N, Mazumder R, Seto D (2002) CoreGenes: a computational tool for identifying and cataloging “core” genes in a set of small genomes. *BMC Bioinformatics* 3: 12.
60. Gill SR, Pop M, Deboy RT, Eckburg PB, Turnbaugh PJ, et al. (2006) Metagenomic analysis of the human distal gut microbiome. *Science* 312: 1355–9.
61. Warnecke F, Luginbühl P, Ivanova N, Ghassemian M, Richardson TH, et al. (2007) Metagenomic and functional analysis of hindgut microbiota of a wood-feeding higher termite. *Nature* 450: 560–5.
62. Zhang T, Breitbart M, Lee WH, Run J-Q, Wei CL, et al. (2006) RNA viral community in human feces: prevalence of plant pathogenic viruses. *PLoS Biol* 4: e3.
63. Grabow W (2001) Bacteriophages?: Update on application as models for viruses in water. *Water SA* 27: 251–68.
64. Teeling H, Meyerdieks A, Bauer M, Amann R, Glöckner FO (2004) Application of tetranucleotide frequencies for the assignment of genomic fragments. *Environ Microbiol* 6: 938–47.
65. Teeling H, Waldmann J, Lombardot T, Bauer M, Glöckner FO (2004) TETRA: a web-service and a stand-alone program for the analysis and comparison of tetranucleotide usage patterns in DNA sequences. *BMC Bioinformatics* 5: 163.
66. Casjens S (2003) Prophages and bacterial genomics: what have we learned so far? *Mol Microbiol* 49: 277–300.
67. Suzuki H, Sota M, Brown CJ, Top EM (2008) Using Mahalanobis distance to compare genomic signatures between bacterial plasmids and chromosomes. *Nucleic Acids Res* 36: e147.
68. Goudie AD, Lynch KH, Seed KD, Stothard P, Shrivastava S, et al. (2008) Genomic sequence and activity of KS10, a transposable phage of the Burkholderia cepacia complex. *BMC Genomics* 9: 615.
69. Man SM, Kaakoush NO, Mitchell HM (2011) The role of bacteria and pattern-recognition receptors in Crohn’s disease. *Nat Rev Gastroenterol Hepatol* 8: 152–68.
70. Kang S, Denman SE, Morrison M, Yu Z, Dore J, et al. (2010) Dysbiosis of fecal microbiota in Crohn’s disease patients as revealed by a custom phylogenetic microarray. *Inflamm Bowel Dis* 16: 2034–42.
71. Mazmanian SK, Round JL, Kasper DL (2008) A microbial symbiosis factor prevents intestinal inflammatory disease. *Nature* 453: 620–5.
72. Park S, Zhang Y, Lin S, Wang TH, Yang S (2011) Advances in microfluidic PCR for point-of-care infectious disease diagnostics. *Biotechnol Adv* 29: 830–9.
73. Niemz A, Ferguson TM, Boyle DS (2011) Point-of-care nucleic acid testing for infectious diseases. *Trends Biotechnol* 29: 240–50.
74. Joo J, Gunny M, Cases M, Hudson P, Albert R, et al. (2006) Bacteriophage-mediated competition in Bordetella bacteria. *Proc. R. Soc. B* 273: 1843–8.
75. Brockhurst MA, Fenton A, Roulston B, Rainey PB (2006) The impact of phages on interspecific competition in experimental populations of bacteria. *BMC Ecology* 6: 19.
76. Scott AE, Timms AR, Connerton PL, El-Shibiny A, Connerton IF (2007) Bacteriophage influence Campylobacter jejuni types populating broiler chickens. *Environ Microbiol* 9: 2341–53.
77. ISO (2001) ISO 10705-4: Water quality. Detection and enumeration of bacteriophages- Part 4: Enumeration of bacteriophages infecting Bacteroides fragilis. International Organisation for Standardization, Geneva.
78. Yamamoto KR, Alberts BM, Benzinger R, Lawhorne L, Treiber G (1970) Rapid bacteriophage sedimentation in the presence of polyethylene glycol and its application to large-scale virus purification. *Virology* 40: 734–44.
79. Lane, DJ (1991) 16S/23S rRNA sequencing. In: Nucleic acid techniques in bacterial systematics. Stackebrandt, E., and Goodfellow, M., eds., John Wiley and Sons, New York, NY, 115–175.
80. Thompson JD, Higgins DG, Gibson TJ (1994) CLUSTAL W: improving the sensitivity of progressive multiple sequence alignment through sequence weighting, position-specific gap penalties and weight matrix choice. *Nucleic Acids Res* 22: 4673–80.
81. Tamura K, Peterson D, Peterson N, Stecher G, Nei M, et al. (2011) MEGA5: Molecular evolutionary genetics analysis using maximum likelihood, evolutionary distance, and maximum parsimony methods. *Mol Biol Evol*. 28: 2731–9.



82. Santos MA (1991) An improved method for the small scale preparation of bacteriophage DNA based on phage precipitation by zinc chloride. *Nucleic Acids Res* 19: 5442.
83. Delcher AL, Harmon D, Kasif S, White O, Salzberg SL (1999) Improved microbial gene identification with GLIMMER. *Nucleic Acids Res* 27: 4636–41.
84. Rutherford K, Parkhill J, Crook J, Horsnell T, Rice P, et al. (2000) Artemis: sequence visualization and annotation. *Bioinformatics* 16: 944–5.
85. Altschul SF, Gish W, Miller W, Myers EW, Lipman DJ (1990) Basic local alignment search tool. *J Mol Biol* 215: 403–10.
86. Lowe TM, Eddy SR (1997) tRNAscan-SE: a program for improved detection of transfer RNA genes in genomic sequence. *Nucleic Acids Res* 25: 955–64.
87. Krogh A, Larsson B, Heijne G von, Sonnhammer EL (2001) Predicting transmembrane protein topology with a hidden Markov model: application to complete genomes. *J Mol Biol* 305: 567–80.
88. Emanuelsson O, Brunak S, Heijne G von, Nielsen H (2007) Locating proteins in the cell using TargetP, SignalP and related tools. *Nat Protoc* 2: 953–71.
89. Lima-Mendez G, Helden J Van, Toussaint A, Leplae R (2008) Prophinder: a computational tool for prophage prediction in prokaryotic genomes. *Bioinformatics* 24: 863–5.
90. Jones BV, Begley M, Hill C, Gahan CGM, Marchesi JR (2008) Functional and comparative metagenomic analysis of bile salt hydrolase activity in the human gut microbiome. *Proc Natl Acad Sci USA* 105: 13580–5.
91. Sun S, Chen J, Li W, Altintas I, Lin A, et al. (2011) Community cyberinfrastructure for Advanced Microbial Ecology Research and Analysis: the CAMERA resource. *Nucleic Acids Res* 39: D546–51.
92. Yooseph S, Sutton G, Rusch DB, Halpern AL, Williamson SJ, et al. (2007) The Sorcerer II Global Ocean Sampling expedition: expanding the universe of protein families. *PLoS Biol.* 5: e16.
